# Supplementary material
Source: publisher figshare collection journal article supplement (https://plos.figshare.com/articles/dataset/_/3932916)
Supplement: Supplementary file 1 [file 1 › S1 File.XLSX]

## Sheet: Sheet1
Year of the bite	Age (in years)	Gender (M=Male; F=Female)	Pregnancy (1=Yes)	Ethnic background (1=White; 2=Black; 3=Asian; 4=Admixed; 5=Amerindian; 9=Ignored)	Schooling (0=Illiterate; 1=1-3 years; 2=4 years; 3=5-7 years; 4=8 years; 5=9-10 years; 6=11 years; 7=Incomplete graduation; 8=Complete graduation; 9=Ignored; 10=Not applied)	Area (1=Urban; 2=Rural)	Time until medical assistance (1=0-1hour; 2=1-3hrs; 3=3-6hrs; 4=6-12hrs; 5=12-24hrs; 6=more than 24hrs; 9=Ignored)	Anatomical region of the bite (1=Head;2=Arm;3=Forearm;4=Hand;5=Finger;6=Body;7=Thigh;8=Leg;9=Foot;10=Toe; 99=Ignored)	Local pain (1=Yes)	Edema (1=Yes)	Ecchymosis (1=Yes)	Necrosis (1=Yes)	Other local manifestations (1=Yes)	Neurological symptoms (1=Yes)	Bleeding (1=Yes)	Vomiting/diarrhoea (1=Yes)	Myolisis/hemolysis (1=Yes)	Clotting time (1=Normal; 2=Abnormal; 9=not performed)	Spider genus (1=Phoneutria;2=Loxosceles;3=Latrodectus;9=Ignored)	Severity classification (1=mild; 2=moderate; 3=severe)	Number of antivenom vials received (units)	Secondary bacterial infection (1=Yes)	Intense necrosis (1=Yes)	Acute renal failure (1=Yes)	Septicemia (1=Yes)	Shock (1=Yes)	Work-related disease (1=Yes; 2=No; 9=Not applied)	Evolution (1=discharge; 2=death)
2009	35	M	6	4	3	2	2	10	1	1	2	2	1	2	2	2	2	1	9	1	2						2	1
2009	60	F	5	4	0	2	5	4	1	1	1	2	1					1	1	2	4						1	1
2009	7	M	6	4	1	2	2	9	1	1	2	2	2					9	9	1	1						2	1
2009	24	M	6	1	2	2	2	5	1	1	2	2	2					1	9	1							1	1
2009	51	F	5	4	0	2	3	4	1	1	2	2	2					9	1	1							1	1
2009	8	M	6	5	1	2	6	4	1	1	2	2	2					1	1	1							2	1
2009	54	M	6	4	9	1	1	10	1	2	2	2	2					9	9	1							9	1
2009	30	M	6	4	2	1	1	5	1	1	2	2	2					1	9	1	3						1	1
2009	72	M	6	4	1	1	3	7	1	2	2	2	2					9	2	1							1	1
2009	22	M	6	4	3	2	1	9	1	1	2	2	2					1	2	1	2						1	1
2009	27	M	6	4	3	1	9	9											9	1
2009	51	F	5	4	1	2	1	4	1	1	2	2	2						1	2							2
2009	7	M	6	5	0	2	1	7	1	1	2	2	2					9	9	1							2	1
2009	14	M	6	4	2	1	5	6	1	1	2	2	2					1	9	1							2	1
2009	64	M	6	4	2	2	3	1	1	2	1	2	2					9	9	1	3						2	1
2009	45	F	6	4	4	2	2	4	1	1	2	2	2					9	2								1	1
2009	54	F	5	1	0	1		4	1	1	1	2	2					9	2	1	3						1	1
2009	37	M	6	4	1	2	3	6	1	2	2	2	2					9	9	2	5						2	1
2009	31	M	6	4	5	1	1	9										1	9	2	4						1	1
2009	50	M	6	4	6	1	2	9	1	1	2	2	2	1	2	1	2		1	2	4
2009	9	M	6	5	1	2	4	5	1	1	2	2	2	2	2	2	2	1	9	1
2009	47	F	9	4	9	2	1	9	1	1	1	2	2					9	9	2	5						1	1
2009	55	F	6	4		2	2	5	1	2	1	2	2					1	9	2	5						2	1
2009	23	M	6	4	2	2	3	4	1	1	2	2	2					2	9	3	8						1	1
2009	50	M	6	2	2	1	1	7	1	2	2	2	2					1	9	1	5						2	1
2009	22	M	6	4	3	2	2	5	1	1	2	2	2					9	1	1							2	1
2009	54	M	6	4	1	1	1	4	1	1	2	2	2					1	3	2	4			2	2	1	1	1
2009	27	M	6	4	9	2	2	4	1	1	2	2	2					9	9	1	3						2	1
2009	32	M	6	4	1	1	2	4	1	2	2	2	2					9	9	1							2	1
2009	51	M	6	4	1	1	2	5	1	1	2	2	2					9	1	1							1	1
2008	25	M	6	2	3	1	3	9	1	1	2	2	2					9	2	1	4						1	1
2009	8	M	6	4	1	2	3	9	1	1	2	2	2					9	9		4						1	1
2009	47	M	6	1	0	1	2	5	1	1	1	2	2					1	2	2	2						2	1
2009	63	M	6	4	0	2	4	9	1	1	2	2	2	1	2	2	2	9	1	2	2						1	1
2009	12	M	6	4	2	2	3	4	1	1	2	2	2	1	1	1	2	9	1	3	4						2	1
2009	8	M	6	4	1	2	2	4	1	1	2	2	2	2	2	1	2	9	1	1	5						2	1
2009	1	F	6	4	10	2	3	9	1	2	2	2	2	2	2	1	2	9	9	2	5						2	1
2008	1	F	6	4	10		2	9	1	2	2	2	2					1	2	2	2						2	2
2009	27	M	6	4	5	1	1	9	1	2	2	2	2					9	1	1							1	1
2009	61	F	5	4		1	3	5	1	2	2	2	2					1	2	1							1	1
2009	35	M	6	4	9	2	2	8	1	1	2	2	2					1	9	1							1	1
2009	61	M	6	4	9	1	1	4	1	1	2	2	2					2	9	1							9	1
2009	1	M	6	4	10	1	1	4										9	9	1							9	1
2009	30	F	5			2	2	8	1	1	2	2	2					1	9	1							1	1
2009	41	M	6	4	9	2	3	9										9	9	1							9	1
2009	52	M	6	4	9	1	1	9	1	2	2	2	2					9	9	1							9	1
2009	15	M	6	4	9	1	2	5	1	2	2	2	2					9	9	1							9	1
2009	51	M	6	4	9	1	9	9	1	2	2	2	1					9	2	1							9	1
2009	17	F	5	4	9	1	5	1	1	2	2	2	1					9	1	2							9	1
2009	12	F	5	4	3	2	2	9	1	2	2	2	2					9	9	1							2	1
2009	18	M	6	4	1	2	2	9	1	1	2	2	2					2	2	3	5						1	1
2009	26	M	6	4	9	2	4	9	1	1	2	2	2					9	2	1	1						1	1
2009	35	F	5	4	9	1	1	9	1	2	2	2	1					9	9	1							9	1
2009	47	F	5	4	9	2	3	9	1	1	2	2	1					9	9	1							9	1
2008	57	F	5	4	9	1	2	4										9	9	1							9	1
2009	41	M	6	4	9	1	2	8	1	2	2	2	2					9	9	1							9	1
2009	2	F	6	4	10	1	9	9	1	1	2	2	2					9	9	1								1
2009	21	M	6	4	9	1	1	4	1	1	2	2	2					9	9	1							9	1
2009	42	F	5	4	9	1	3	4	1	1	2	2	2					9	9	1							2	1
2009	27	M	6	4	9	1	2	9	1	1	2	2	2					9	9	1							9	1
2009	23	M	6	4	9	1	1	9	1	1	2	2	2					2	9	1							9	1
2009	14	F	6	4	9	2	3	10	1	1	2	2	2					9	9	1							9	1
2009	62	F	5	4	9	1	1	4	1	2	2	2	2					9	9	1	2						2	1
2009	63	M	6	4	9	2	3	2	1	2	2	2	1					1	9	1							2	1
2009	20	M	6	4	9	1	1	6										9	9	1							9	1
2009	32	M	6			1	2	6	1	1	2	2	2					1	9	1							2	1
2009	5	M	6	4	10	1	1	9	1	1	2	2	2					9	9	1							9	1
2009	5	M	6	1	10	1	2	4	1	1	2	2	2					9	9	1	5						9	1
2009	31	M	6	4	9	1	1	5	1	1	2	2	2					9	9	1							9	1
2009	12	M	6	4		1	1	1	1	1	2	2	2					1	9	1							2	1
2009	47	M	6	4	9	1	9	9										9	9	9							2	1
2008	27	F	5	4	9	1	2	9	1	1	2	2	2					9	9	1							9	1
2009	36	M	6	4		1	9	4										9	9	1							9	1
2009	54	F	5	4	9	1	2	5	1	1	2	2	1					9	9	1							2	1
2009	20	F	6	4	9	1	9	5	1	1	2	2	2					9	9	1							9	1
2009	32	M	6	4		1	2	4	1	2	2	2	2	2	2	1	2	2	9	1							2	1
2009	57	F	6	4	9	1	9	9										2	9	1							2	1
2009	36	M	6			1	5	5	1	2	2	2	1					1	9	1							2	1
2009	22	M	6			1	5	4	1	2	2	2	1					1	9	1							2	1
2009	85	M	6			1	6	10	2	1	2	2	2					2	9	1							1	1
2009	25	M	6	4	9	1	3	9	1	2	2	2	2					9	9	1							9	1
2009	58	F	5	4	9	1	9	8	1	1	2	2	2					9	9	1							9	1
2009	41	F	6	4	9	1	1	2	1	1	2	2	2					9	9	1							9	1
2008	14	F	1	4	9	1	2	4	1	2	2	2	2					9	9	1							9	1
2008	61	F	5	4	9	1	5	9	1	1	2	2	2					1	9	1							9	1
2009	26	M	6	4	9	1	2	4	1	2	2	2	1					9	1	2							9	1
2009	48	F	5	4	6	1	2	10	1	1	2	2	2					2	9	1	2						2	1
2009	10	M	6	4	9	1	3	5	1	1	2	2	2					9	9	1							2	1
2009	49	F	5	1	2	2	2	10	1	1	2	2	2					9	9	1							1	1
2009	15	M	6	5	1	2	1	9	1	1	1	2	2					1	9	1	1						1	1
2009	50	F	5	4	3	2	3	9	1	1	2	2	2	1	2	2	2	9	1	2	4						2	1
2009	17	M	6	4	3	1	1	9										9	9	1							1	1
2009	25	M	6	4	4	1	2	5	1	1	2	2	2					9	2	2	5						2	1
2009	64	M	6	5	0	2	1	5	1	2	2	2	2					9	9	1							2	1
2009	42	F	5	4	6	2	1	2	1	1	2	2	1	2	2	2	2	9	9	2	5						1	1
2009	26	F	5	4	4	1	2	3	1	2	2	2	2					2	9	1							2	1
2009	22	M	6	1	2	2	1	3	1	1	2	2	2					9	9	2	3						1	1
2009	23	F	5	4	2	1	2	3	1	1	1	2	2					9	9	1	2						1	1
2009	36	M	6	5	0	2	2	9	1	1	2	2	2					1	9	1							1	1
2009	28	F	5	4	6	1	1	7	1	2	1	2	2					1	9	1							2	1
2009	21	M	6	4	2	2	2	4	1	2	2	2	2					1	9	2	2						1	1
2009	21	M	6	4	2	2	2	4	1	1	2	2	2					1	9	2	2						1	1
2010	30	M	6	4	9	1	9	8	1	2	2	2	1					9	1	2							2	1
2009	59	M	6	4	9	1	9	8	1	2	2	2	2					9	1	1							2	1
2010	3	M	6	5	10	1	1	9	1	2	2	2	2					9	9	1							2	1
2009	53	F	6	4	4	2	3	5	1	2	1	2	2					9	9	1	2						1	1
2010	52	F	5	5	1	2	1	10	1	2	2	2	2					9	9	1							2	1
2009	78	F	5	1	1	1	3	5	1	1	2	2	2					1	9	2	1						2	1
2010	18	M	6	4	3	1	1	4	1	1	2	2	2					2	2	2	2						2	1
2009	56	M	6	4	1	2	1	2	1	2	2	2	9						9	1	5						1	1
2007	42	M	6	4	3	1	1	5	1	1	2	2	2					9	9	1	2						1	1
2007	6	F	6	4	10	2	2	5	1	1	2	2	2					1	9	1	1						2	1
2007	67	F	5	4	9	1	4	4	1	1	2	2	2					1	9	1	2						2	1
2007	54	F	6	5	9	1	3	10	1	1	2	2	2					9	9	1							2	1
2007	65	F	5	5	1	2	1	5	1	2	2	2	2					1	9	1							1	1
2007	50	M	6	4	1	1	4	5	1	2	1	2	2					2	2	1	2						1	1
2007	38	F	5	5	9	2	3	8	1	1	2	2	2					1	9	1							1	1
2007	26	M	6	5	9	2	3	8	1	1	2	2	2					2	9	1							1	1
2007	48	M	6	5		2	3	10	1	2	2	2	2					1	9	1							1	1
2007	26	M	6	4	3	2	2	4	1	1	2	2	1					9	9	1	2						2	1
2007	61	F	6	4	1	2	1	4	1	2	2	2	1					9	9	1	4						1	1
2007	34	M	6	4	9	1	3	8	1	1	2	2	2	2	2	2	2	9	9	1							2	1
2007	25	M	6	4	1	2	6	9	1	1	2	2	2					9	9	9		1	2				2	1
2007	17	F	5	1	2	2	3	6	1	2	2	2	2					1	9	1	2						2	1
2007	6	M	6	5	10	2	1	9	1	1	2	2	1					9	9	1							1	1
2007	52	M	6	5	3	1	5	9										2	2	1							2	2
2007	30	M	6	4		1	2	4	1	1	2	2	2	2	2	2	2	9	9	2							1	1
2007	17	F	5	5	3	2	3	2	1	1	2	2	2					9	9	1							1	1
2007	47	M	6	5	0	2	1	9	1	1	2	2	2					9	9	1							2	1
2007	33	F	5	4	6	1	1	99	1	2	2	2	2					1	2	1	5						9	1
2007	67	M	6	4	1	2	2	10	1	1	2	2	2	2	2	2	1	1	2	1							1	1
2007	22	F	5	4	2	2	5	4	1	2	2	2	1					1	9	2	2						2	1
2007	51	M	6	4	3	2	1	4	1	2	2	2	1					1	2	2	4						2	1
2007	22	F	5	4	5	2	2	4	1	1	2	2	2					1	9	1	2						2	1
2007	27	M	6	4	3	1	2	9	1	1	2	2	2					9	1	2	2						1	1
2007	70	M	6	4		2	2	6	1	1	2	2	2					9	9	1							2	1
2007	30	F	5	4	3	1	1	4	1	2	2	2	2					9	9	1							2	1
2007	39	F	5	4	2	2	2	2	1	1	2	2	2					9	9	1	4						2	1
2007	25	F	5	5	2	2	4	10	1	1	2	2	2					1	9	1							2	1
2007	66	F	5	4	0	1	3	10	1	2	1	2	2					9	9	2	2						1	1
2007	62	M	6	4	2	2	2	9	1	1	2	2	1					2	9	2	3						1	1
2007	70	M	6	4	2	1	1	4	1	1	2	2	2					1	9	3	4						1	1
2007	45	M	6	4	5	1	3	5	1	1	2	2	2					2	9	1	2						1	1
2007	16	M	6	4	3	1	1	9	1	2	2	2	2					1	1	1							1	1
2007	26	M	6	4	3	1	1	9	1	1	2	2	2					9	9	1	1						1	1
2007	77	M	6		1	1	1	7	1	2	2	2	2					1	9	1							2	1
2007	25	M	6	4	4	2	1	2	1	2	2	2	2					9	2	2		2	2	2	2		1	1
2007	5	M	6	4	10	2	2	8	1	2	2	2	2					1	9	1							2	1
2007	27	M	6	4	6	1	2	10	1	2	2	2	2					1	3	1	2						2	1
2007	14	M	6			1	1	9	1	2	2	2	2					1	9	1	2						2	1
2007	21	F	5	4		1	6	8	1	2	2	2	2					9	9	1							2	1
2007	32	M	6	2	1	2	3	2	1	2	2	2	2	1	2	2	1		9	2	3						2	1
2007	26	F	5	4		1	1	9	1	1	1	2	2					9	9	1							2	1
2007	34	F	6	1	6	1	1	8	1	1	2	2	2					1	9	1	1						2	1
2007	22	F	5	5	1	2	1	4	1	1	2	2	2					1	9	1							2	1
2007	49	M	6	5	9	1	1	4	1	1	2	2	2					9	9	1							1	1
2007	29	M	6	5	9	2	2	9	1	2	2	2	2					1	3	1							1	1
2007	63	F	5	4	1	2	3	9	1	2	2	2	2					9	9	1	3						1	1
2007	64	M	6	4	4	1	4	5	1	2	2	2	2					1	2	1	1						1	1
2007	32	F	5	4	5	1	1	5	1	2	2	2	2					1	9	1	3						2	1
2007	34	M	6	4	5	1	1	4										1	1	1	5						1	1
2007	34	M	6	4	3	2	6	4	1	1	2	2	2					1	1	1	4						2	1
2007	48	F	9	4	3	2	3	4	1	2	2	2	2					1	1	2	4						1	1
2007	57	F	5	4	2	1	2	4	1	2	2	2	9					1	9	2							1	1
2007	27	F	6	4	4	1	9	5	1	2	2	2	2					9	9	1							2	1
2007	17	M	6	4	5	1	2	4	1	1	1	2	2					9	9	1	4						2	1
2007	44	M	6	1	4	1	4	2	1	1	2	2	2					1	9	1	2						1	1
2007	41	M	6	5	1	1	4	6	1	1	2	2	2	2	2	2	2	9	9	1	2						1	1
2007	52	M	6	4	3	1	1	10	1	1	2	2	2					2	9	2							1	1
2007	36	M	6	4	8	1	1	10	1	2	2	2	2					1	3	2	3						1	1
2007	44	F	9	4	1	2	1	10	1	1	2	2	2					1	1	1							2	1
2007	50	M	6	4	4	2	1	9										1	9	1							1	1
2007	46	F	6	4	3	1	2	9	1	1	2	2	2					9	9	1							2	1
2009	5	F	6	9	10	1	6	4	2	1	2	2	2					9	9	2	2						2	1
2009	50	M	6	4	1	1	1	1	1	1	2	2	2					1	9	1	2						1	1
2009	44	M	6	5	0	2	1	7	1	1	2	2	2					9	9	1							2	1
2009	35	M	6	5	0	2	1	4	1	1	2	2	2					9	9	1							1	1
2009	34	M	6	4		2	2	4	1	1	2	2	2					9	2	1							1	1
2009	19	M	6	4	3	1	2	9	1	2	2	2	1					9	9	1	3						2	1
2007	20	M	6	4	3	1	1	9										1	9	1							2	1
2009	15	M	6	4	2	2	2	9	1	1	1	2	2					2	2	1	5						2	1
2009	54	M	6	1	2	2	3	1	1	1	2	2	2					1	9	1							1	1
2009	44	M	6	1	8	2	6	9	1	1	2	1	2					1	9	1							1	1
2009	56	F	5	4	1	2	1	4	1	2	2	2	2					1	9	2	3	1	1				1	1
2009	3	M	6	4	10	2	1	4	1	1	2	2	2					9	1	1							2	1
2009	43	M	6	4			2	4	1	1	2	2	2	2	2	1	2	9	2	2							2	1
2009	61	M	6	4	1	2	3	4	1	1	2	2	2					1	9	1	2						1	1
2007	45	M	6	4		1	4	10	1	1	2	2	2					9	9	1	3						2	1
2009	57	F	5	4	0	2	3	5	1	1	2	2	2					1	1	1							2	1
2009	71	M	6	4	3	1	1	9	1	2	2	2	2						9	2	4						2	1
2009	47	M	6	2	0	1	1	4	1	1	2	2	2	2	2	2	2	1	9	1							1	1
2009	26	F	1	4	2	2	2	9	1	1	2	2	2						9	2	3						1	1
2009	16	M	6	4	9	1	9	9										9	9	9							1	9
2009	43	F	5	4	1	1	3	4	1	1	2	2	1					9	1	1							2	1
2009	12	M	6	4	1	2	5	8	1	1	1	1	1	1	2	1	1	2	2	2							1	1
2009	15	M	6	4		2	2	5	1	2	2	2	2					1	9	2	3							1
2009	42	F	5	4		2	1	4	1	1	2	2	2					2	9	2	3							1
2009	15	M	6	4	5	1	1	9	1	2	2	2	2						9	2	3						2	1
2009	69	F	6	1	7	1	1	10	1	1	1	2	2					1	2	2	5						2	1
2009	1	M	6	4	10	2	2	3	1	2	2	2	2					9	9	2	5						1	1
2009	35	F	5	4	6	1	1	5	1	1	2	2	2					9	1	2	4						1	1
2009	25	M	6	5		2		8	1	1	2	2	2					9	9	1							1
2009	51	F	5	5	1		3	4	1	1	1	2	2					2	2	2	6
2009	43	F	5	4	0	1	2	5	1	1	2	2	2					1	1	1	2						1	1
2009	19	M	6	4	4	1	1	1	1	2	1	2	2	2	2	1	2	9	2	2	4						2	1
2009	8	M	6	4	1	2	1	5	1	1	2	2	2					9	9	1							2	1
2009	42	M	6	4	4	1	2	10										2	9	1							2	1
2009	17	M	6	4	1	1	3	10	1	1	2	2	2						2		4						1	1
2009	30	F	6	4	3	1	3	4	1	1	2	2	2					9	9	1	3						1	1
2009	40	M	6	4	3	2	1	9	1	1	2	2	2					9	2	1	1						1	1
2009	34	M	6	4	9	1	2	5	1	2	2	2	2					9	9	2	5						1	1
2009	3	M	6	4	10	2	9	9	1	2	2	2	2					9	9	1							2	1
2009	68	M	6	4	9	2	3	5	1	2	2	2	2					9	9	9	1						1	1
2009	32	M	6	4	3	1	1	9	1	2	2	2	2					9	9	1							1	1
2009	25	M	6	4	6	1	2	9	1	2	2	2	2	1	2	2	2	1	9	1							1	1
2008	61	F	6	4	3	1	2	9	1	2	2	2	2					1	2	1	5						2	1
2008	9	M	6	5	9	2	9	9	1	1	2	2	2					9	2	1							1	1
2008	18	M	6	4	3	1	4	10	1	2	2	2	2					9	2	2	3						1	1
2008	40	M	6	4	5	2	3	5	1	1	2	2	2					9	2	1	5						1	1
2008	50	M	6	1	2	2	6	1	1	2	2	2	1					1	9	2	2						1	1
2008	64	M	6	4	2	1	1	9	1	2	2	2	2					9	1	1	2						1	1
2008	31	M	6	1		2	4	9	1	1	2	2	2						9	1							2	1
2008	27	F	5	4	8	1	4	2	1	1	1	2	1					1	9	1							2	1
2008	34	M	6	4	2	1	2	9	1	2	2	2	2					9	9	1							2	1
2008	35	M	6	4		2	2	5	1	2	2	2	2						2	1	2						1	1
2008	23	M	6	4	3	2	9	9	1	2	2	2	2					9	9	3	6						2	1
2008	27	F	5	4	9	1	6	3	1	2	2	2	1					9	9	1							9	1
2008	66	F	5	4	9	1	2	5	1	1	2	2	2					1	9	1							9	1
2008	40	M	6	4	1	2	2	9	1	1	2	2	2						9	1								1
2008	39	M	6	4	2	2	2	8	1	2	2	2	2						1
2008	14	M	6	2	2		4	8	1	1	1	2	2	2	2	1	2	1	9	2	7						2
2008	46	F	5	4		2		4	1	2	2	2	2						9	1							9	1
2008	52	M	6	5	2	2	5	9	1	1	1	2	2					2	2	2	4						1	1
2008	26	M	6	4	5	1	3	4	1	1	2	2	2					1	9	1	2						2	1
2008	16	M	6	4		1		2	1	1	2	2	2						9	1							9	1
2008	67	M	6	4	1	1	1	5	1	1	2	2	2					1	9	1	2						1	1
2008	48	M	6	1	1	1	3	4	1	1	2	2	2					2	9	2	3						1	1
2008	41	M	6	1	1	2	6	5	1	2	2	1	2					1	9	1		1	1				1	1
2008	32	M	6	4			1	2	1	1	2	2	2						9	1							9	1
2008	79	M	6	4		2	9	9	1	1	2	2	2						9	1							9	1
2008	17	F	5	4		1		10	1	1	2	2	2						9	1							2	1
2008	74	M	6	4	0		1	7	1	2	2	2	2	1	2	2	2	9	1	2	2						2	1
2008	39	F	5	2	1	1	2	4	1	2	2	2	2					9	9	1							2	9
2008	71	M	6	1	2	1	1	10	1	1	2	2	2					1	9	1	3						1	1
2008	25	F	5	4	4	1	2	5	1	1	2	2	2					9	9	1							2	1
2008	14	F	5	4		2	1	9	1	1	2	2	2					9	9	1							2
2008	64	M	6	5	0	2	1	5	1	1	2	2	2					9	9	1							1	1
2008	47	F	5	4	1	1	2	5	1	1	2	2	2					9	2	1	4						2	1
2008	27	F	5	4	3	2	2	4	1	1	2	2	2					9	2	2	10	1	2				2	1
2008	74	M	6	4	1	1	5	9	1	2	2	2	1					9	9	1							1	1
2008	29	F	5	5	4	2	2	8	1	1	2	2	2					1	9	1							1	1
2008	2	F	6	4	10	1	1	9	1	1	2	2	2					9	9	1							2	1
2008	38	M	6	4	3	2	4	4	1	1	2	2	2					9	9	1							1	1
2008	18	F	5	4		1	1	4	1	1	2	2	2					9	9	1							1	1
2008	53	F	5	4	1	1	1	10	1	1	2	2	2	1	2	2	2	1	3	1	4	1	2	2	2		1	1
2008	40	M	6	4	2	1	1	9	1	1	2	2	2						2	2	2						2	1
2008	51	M	6	1	2	2	5	5	1	2	2	2	2					9	9	1	3						1	1
2008	52	M	6	4	9	1	1	5	1	1	2	2	2					1	1	1							1	1
2008	17	M	6	4	5	2	2	4	1	1	2	2	2					9	1	2	2						1	1
2008	25	M	6	4	3	1	2	9	1	1	2	2	2					9	1	2	3						1	1
2008	50	M	6	4	1	1	2	5	1	1	1	2	2					9	9	2	5						1	1
2008	9	F	6	4	9	1	6	5	1	1	2	2	2	2	2	2	2	1	9	1				2	1		9	1
2008	15	M	6			2	2	4	1	1	2	2	2	2	2	2	2		9	3	5			2	9		1	1
2008	43	M	6	4	2	2	3	9	1	1	2	2	2					1	9	2							1	1
2008	30	M	6	4	3	2	3	9	1	1	2	2	2					2	9	1							2	1
2008	24	M	6	4	9	2	9	4	1	2	2	2	2						9	1							9	1
2008	49	F	5	4	2	1	1	10	1	1	2	2	2					1	2	2							1	1
2008	61	M	6	1		1	1	9	1	1	2	2	2						9	1								1
2008	49	F	5	4	9	1	3	9	1	2	2	2	2					9	9	1							9	1
2008	66	F	5	4	2	1	1	10	1	2	2	2	2					9	9	1	2						2	1
2008	10	F	6	4	1	1	6	4	1	1	2	2	2					9	9	1							2	1
2008	47	M	6	4	3	2	2	4	1	1	2	2	1	2	2	2	1	1	2	1	1						1	1
2008	23	M	6	4	3	1	1	4	1	1	2	2	2						9	2	2						2	1
2008	40	F	9	1	2	1	1	5										9	9	2	2						9	1
2008	38	M	6	4	5	1	2	8	1	1	2	2	2	1	2	2	2	9	9	1	2						1	1
2008	52	F	5	4	4	1	1	3	1	1	2	2	2					9	9	1	1						2	1
2008	25	M	6	4	9	1	1	5	1	1	2	2	2					9	9	1	1							1
2008	44	F	5	4	3	1	1	5	1	1	2	2	2					1	9	2	3						1	1
2008	4	M	6	4	10	2	1	9	1	1	2	2	2					1	1	2	2						2	1
2008	17	F	5	4	3	1	2	7	1	2	2	2	2					9	9	1							2	1
2008	12	F	5	1	9	1	1	5	1	1	2	2	1					1	9	1	2						2	1
2008	51	M	6	4	1	1	3	9	1	1	2	2	2	1	2	2	2	9	9	1							2	1
2008	50	M	6	4		1	9	9	1	1	2	2	2						9	1							9	1
2008	25	M	6	4	3	1	3	4	1	1	2	2	2	1	2	2	2	1	2	1	2						1	1
2008	28	M	6	4	6	1	2	5	1	1	2	2	2					1	9	2	2						1	1
2008	16	M	6	2	1	1	3	9	1	1	1	2	2	1	2	2	2	1	9	2	2						1	1
2008	40	M	6	4	0	2	5	10	1	2	1	2	2					9	9	1	1						1	1
2008	13	F	5	4	9	2	1	99	1	1	2	2	1					9	9	1	1						2	1
2009	64	F	5	5	1	1	6	9	1	1	1	2	2					9	9	1							1	1
2010	21	M	6	4	9	1	9	9	1	2	2	2	1					9	9	1							2	1
2009	28	M	6	4	1	2	2	5	1	1	2	2	2						9	2	4						2	1
2010	15	F	9	9	9	1	1	5	1	1	2	2	1					9	9	9							9	9
2010	72	M	6	4		1	2	4	1	1	2	2	2					1	9	2	2						1	1
2010	21	M	6	4	9	1	1	9	1	1	2	2	2					9	9	2	4						2	1
2010	50	M	6	4	1	1	2	5	1	2	2	2	2						9	1	2						1	1
2010	26	F	5	4	6	1	1	4										9	2	1							2	1
2010	31	M	6	4	4	2	2	9										9	2	3	5						9	1
2010	36	M	6	4	3	1	2	9	1	1	2	2	2	2	2	1	2	2	9	1	1						2	1
2010	36	M	6	4	3	2	1	8	1	2	1	2	2					9	1	2	4						9	1
2009	46	M	6	4	1	1	2	10	1	1	2	2	2	2	2	2	2	9	9	2	4						1	1
2007	32	F	9	4	1	2	3	9	1	2	2	2	2					1	9	1							1	1
2008	12	M	6	4	1	2	2	9	1	2	2	2	2					9	9	1							2
2008	28	M	6	4	3	1	2	5	1	2	2	2	2					9	9	1							1	1
2009	42	M	6	4	9	1	1	3	1	1	2	2	2					9	1	1							2	1
2010	50	F	5	4	1	1	2	9	1	1	2	2	2					9	9	2	4						2	1
2010	15	M	6	4	4	2	5	10	1	1	2	2	2					1	9	1							1	1
2010	37	M	6	1	2	2		9											9	1							2	1
2010	60	F	6	4		2	2	9	2	2	2	1	2						1	1							1	1
2010	3	F	6	4	10	1	6	10	1	1	2	2	2	2	2	1	2	9	9	2							2	1
2010	76	M	6	5		2	1	10										1	9	1	8						9	1
2010	40	M	6	4	6	1	1	4	1	1	1	2	2	1	2	2	2	1	1	2	2						2	1
2010	10	F	6	2		1	4	5	1	1	2	2	2					1	9	1	5						2	1
2010	33	M	6	4	4	2	2	9	1	1	2	2	2					1	9	1	3						1	1
2010	15	F	5	4	3	1	1	4	1	1	2	2	2					1	1	2	3						2	1
2010	1	M	6	5	10	1	1	3	1	1	2	2	1					1	2	2	2						2	1
2010	26	M	6	1	3	1	1	9										9	9	9							2	1
2010	32	M	6	5	9	2	5	5	1	1	2	2	2					9	9	9							9	1
2010	78	F	5	1	0	2	2	8	1	2	2	2	2					9	2	2							2	1
2010	40	M	6	1	1	2	6	9										9	2	1	3
2010	60	M	6	1	1	1	3	10	1	2	2	2	2	1	2	1	1	9	9	2	6						1	1
2010	27	M	6	2	9	2	1	4	1	1	2	2	2					9	9	1							1	1
2010	19	F	4	4	3	2	2	5	1	1	2	2	2					9	9	2	5						1	1
2010	58	M	6	2	4	2	2	4	1	1	2	2	2					9	9	2	3						1	1
2010	32	M	6	4	3	2	2	4	1	1	2	2	2					9	9	2	4						1	1
2010	10	M	6	2	9	2	2	4	1	1	2	2	2					9	9	1							2	1
2010	22	F	5	2	3	2	2	9	1	1	2	2	2					9	9	1							2	1
2010	26	M	6	2	3	2	2	4	1	1	2	2	2					9	9	1							1	1
2010	1	M	6	2	10	2	2	4	1	1	2	2	2					1	9	1							2	1
2010	42	F	5	4	1	2	3	5	1	1	2	2	2					1	9	1							1	1
2010	48	F	9	9	5	1	3	8	1	1	2	2	2					9	2	9	3						1	1
2010	57	M	6	4	1	2	3	5	1	1	2	2	2					1	9	2	5						1	1
2009	42	M	6	4	0	1	1	9	1	2	2	2	2					9	9	1							1	1
2009	54	M	6	1	1		2	9	1	2	2	2	2						2	1	3						1	1
2010	83	M	6	4	0	1	2	4	1	1	2	2	2					1	1	1							1	1
2010	19	M	6	1	5	2	1	10	1	1	2	2	2						9	2	4						2	1
2009	71	M	6	4	0	1	2	5	1	1	2	2	2					1	1	2	2						1	1
2010	21	M	6	4	1	2	5	9	1	1	2	2	2	2	1	1	1	9	9	2	10						1	1
2010	35	M	6	1	6	1	1	5	1	1	2	2	2					9	2	1							2	1
2010	3	F	6	4	10	2	1	10	1	1	2	2	2					9	9	1							2	1
2010	56	F	5	4		2	1	5	1	1	2	2	2					1	9	2	3						1	1
2010	45	M	6	1	3	2	2	10	1	2	2	2	2					1	9	2	2						1	1
2010	28	M	6	1	3	2	2	9	1	2	2	2	2					2	9	2	2						1	1
2010	35	F	5	4	6	1	1	5	1	1	2	2	2					2	9	1							2	1
2010	58	M	6	4	2	2	3	9	1	2	2	2	2					1	9	1							1	1
2010	44	M	6	4	9	2	4	4											9	1
2010	10	M	6	4	3	2	5	9	1	1	2	2	2					9	9	1							1	1
2010	42	M	6	1	2	1	1	1	1	2	2	2	2					1	9	2	2						2	1
2010	1	F	6	1	10	2	4	4	1	1	2	2	2					9	9	1							9	1
2010	19	F	5	1	2	2	4	10										9	9	1							2	1
2010	12	M	6	1	1	2	2	5	1	2	2	2	2					9	9	1							2	1
2010	1	M	6	1	10	1	1	5	1	2	2	2	2					9	9	1							2	1
2010	39	F	5	4	4	2	3	4	1	2	2	2	2					9	9	1							1	1
2010	66	M	6	4	1	1	2	5	1	2	2	2	2					2	9	3	5						1	1
2010	46	F	5	5	1	2	2	9	1	1	2	2	2					1	9	1							2	1
2009	40	M	6	4	3	1	2	4	1	2	2	2	2						2	1							1	1
2009	9	M	6	1	1	1	1	10	1	1	2	2	2					9	2	1	4						2	1
2010	1	F	6	4	10	1	1	9	1	2	2	2	2					9	9	1							1	1
2010	37	M	6	4	0	1	1	4	1	1	2	2	2					1	9	1							1	1
2010	6	M	6	4	10	1	1	5	1	1	2	2	2					9	2	1	2						9	1
2010	15	F	1	2	3	1	4	9	1	1	2	2	2					9	9	1							2	1
2010	62	M	6	4	3	1	1	9	1	2	2	2	2					9	9	1							2	1
2009	19	M	6	4	3	1	1	4	1	1	2	2	2					2	9	1							1	1
2010	22	M	6	3	3	1	1	4	1	2	2	2	2					9	9	1							2	1
2010	13	M	6	9		1		8	1	1	2	2	2					9	9	9							2	9
2010	4	M	6	4	10	1	1	10										9	9	1							2	1
2010	25	M	6	4	1	1	1	5	1	1	2	2	2					9	9	1							2	1
2010	52	F	5	4	1	1	5	5	1	2	2	2	2					9	9	1							1	1
2010	42	F	5	4		2	5	9	1	1	1	2	2					9	9	1							2	1
2010	24	M	6	4	4	1	2	9	1	1	2	2	2					9	9	1							1	1
2010	41	M	6	4	1	2	5	9	1	2	2	2	2	2	2	2	2	9	9	1							1	1
2010	9	F	6	5	1	2	2	9	1	1	2	2	2	2	2	2	2	1	9	2	2						2	1
2010	15	F	6	4	5	1	1	4	1	1	1	2	2	2	1	2	2		9	2	2						1	1
2010	44	M	6	2	1	1	3	9	1	1	2	2	2					9	3	2	5						9	1
2010	18	F	5	1	4	2	4	10	1	2	2	2	2					9	9	1							1	1
2010	3	M	6	1	10	1	2	8	1	2	2	2	2					9	9	1							2	1
2010	28	M	6	1	5	2	2	9	1	1	2	2	2					9	9	1	2						1	1
2010	60	M	6	1	1	1	2	3	1	1	2	2	2					9	9	1							1	1
2010	47	M	6	1	2	2	3	10	1	2	2	2	2					1	9	2	4						1	1
2010	12	M	6	1	1	2	2	1	1	2	2	2	2					9	9	1							2	1
2010	26	M	6	4	2	2	1	3	1	1	2	2	2					9	9	2	3						1	1
2010	16	M	6	4	2	1	1	5	1	1	2	2	2					9	9	2	2						1	1
2010	48	M	6	4	1	1	2	4	1	1	2	2	2					1	9	2	2							1
2010	2	M	6	4	10	2	5	2	1	1	1	2	2					1	2	2	4						2	1
2010	22	M	6	4	5	1	2	10	1	1	2	2	2					9	9	1							1	1
2010	39	M	6	4	3	1	1	10	1	1	2	2	2					1	9	2	2						1	1
2010	21	M	6	4	9	1	1	1	1	1	1	2	2	2	2	2	2	9	2	2	6						1	1
2010	31	M	6	5	5	2	2	99										9	9	1	5						1	1
2010	67	F	5	5	1	2	1	9	1	1	2	2	2					1	1	2	5						1	1
2011	45	F	5	4	1	2	2	9	1	1	2	2	2					1	1	2	5						1	1
2011	47	M	6	5	1	1	4	4	2	1	1	2	2					9	9	2	8						1	1
2011	66	F	5	1	3	2	1	4	1	1	2	2	2					9	9	2	2						1	1
2011	10	F	6	4	1	2	2	9	1	2	2	2	2					9	9	2	2						2	1
2011	35	F	5	5	3	2	3	9										1	9	1	4						1	1
2011	20	M	6	4	4	2	3	5	1	2	2	2	2					9	9	1							1	1
2010	60	F	5	5		2	3	4	1	1	2	2	2					9	9	1							2	1
2010	65	M	6	4		1	1	10	1	1	2	2	2					9	9	1							2	1
2010	51	M	6	4	3	1	1	9	1	1	2	2	2					2	9	1							1	1
2011	40	M	6	4		1	1	4	1	1	2	2	2					2	9	2	4						1	1
2011	16	M	6	4	3	1	9	4	1	2	2	2	2					9	9	2	3						2	1
2011	1	M	6	4	10	1	1	5	1	2	2	2	2					9	9	2	3						2	1
2011	38	M	6	4	3	2	3	4	1	1	2	2	2					9	9	1							2	1
2011	36	M	6	4	3	1	1	4	1	1	2	2	2					9	1	1							2	1
2011	31	F	5	4		1	1	5											9	2	2
2011	27	M	6	4	2	1	3	5						1	2	2	1	1	9	2	4						2	1
2011	56	F	5	4	1	2	2	4	1	2	2	2	2					9	9	1							2	1
2011	31	F	6	5	6	2	2	8	1	1									2	1							1	1
2011	32	F	5	4	1	2	4	9	1	2	2	2	2					1	9	9	4						1	1
2011	51	F	5	4	1	2	2	9	1	1	2	2	2					9	9	1							1	1
2011	62	F	6	4		1	3	9	1	1	2	2	2					1	1	1	2						2	1
2011	35	M	6	4	4	1	1	5	1	2	2	2	2					9	9	2							2
2011	61	M	6	4	5	2	3	3	1	2	2	2	2					9	9	1							2	1
2011	14	F	5	4	3	2	1	2	1	1	2	2	2					9	9	1	1						2	1
2011	38	M	6	4	3	1	1	5	1	2	2	2	2					9	9	2	3						2	1
2011	11	F	9	9	9	1	9	4										9	9	9							2	1
2011	10	M	6	4		1	2	10	1	2	2	2	2					9	9	1							2	1
2011	10	M	6	1	1	2	1	8	1	1	2	2	2					9	9	1							2	1
2011	41	F	5	4	1	1	2	5	1	1	2	2	2					1	9	1							1	1
2011	77	M	6	4	9	2	3	9	1	2	2	2	2						9	1							9	1
2011	26	M	6	4	3	2	2	4	1	1	2	2	2					1	1	2	2						1	1
2011	52	F	5	5	6	1	1	10	1	2	2	2	2					9	2	2	3						1	1
2011	23	M	6	4	0	2	3	4	1	1	2	2	2					2	2	2	3						1	1
2011	24	M	6	4	3	1	3	99	1	2	2	2	2					1	9	2	5						1	1
2011	60	M	6	4	1	2	1	5											2	2	5						1	1
2011	44	M	6	4	1	2	1	4	1	1	2	2	2					2	9	2	4						1	1
2011	35	M	6	4		1	2	4										1	9	1							2	1
2011	32	F	6	4	5	1	3	10	1	1	2	2	2					1	9	1							2	1
2011	44	F	6	4	1	1	1	4	1	1	2	2	2					9	2	2	5						2	1
2011	26	M	6	4	6	2	1	1	1	1	2	2	2					2	9	2							1	1
2011	39	M	6	1	2	1	1	6	1	2	2	2	2						9	1	3						1	1
2011	54	F	5	4	3	1	1	4	1	1	2	2	2					9	1	2	3						2	1
2011	36	F	5	1	2	2	3	4	1	1	2	2	2					9	9	1							1	1
2011	9	M	6	4		1	1	9	1	2	2	2	2					9	9	1							2	1
2011	47	M	6	4	1	1	1	5	1	1	2	2	2					9	9	1	2						1	1
2011	34	M	6	9	9	1	9	99	1	9	9	9	1						9	9							9	1
2010	51	F	5	4	3	1	1	4	1	1	2	2	2					9	9	1							2	1
2010	46	M	6	4	3	2	1	6	1	2	2	2	2					9	2	2	5						2	1
2010	16	M	6	4	4	2	2	4	1	1	2	2	2					9	1	1							2	1
2010	36	F	5	4	3	1	1	3	1	1	2	2	2					9	1	1							2	1
2011	37	F	6	4	1	1	4	6	1	1	2	2	2					1	9	1							1	1
2011	68	M	6	4	1	2	2	4	1	2	2	2	2	2	2	1	2	1	9	2	2						1	1
2011	73	M	6	4	0	2	3	5	1	1	2	2	2					1	9	2	4						2	1
2011	3	F	6	4	10	2	2	10	1	1	2	2	2					2	9	1	0						2	1
2011	46	M	6	2	1	2	5	8	1	1	1	2	2					2	2	2	5	1	2				1	1
2011	21	M	6	4	1	2	2	8											2	1							1	1
2011	12	M	6	4	9	1	5	1	1	1	2	2	2					2	9	2	4						1	1
2011	14	F	5	2	3	2	2	10	1	2	2	2	2					9	9	1							2	1
2011	11	M	6			1	5	4	1	1	2	2	2					9	9	1							2	1
2011	26	M	6	5	3	2	4	5	1	1	2	2	2					1	2	1	5						2	1
2011	73	F	5	4	6	1	2	9	1	1	2	2	2						9	1							2	1
2011	2	F	6	4	10	1	1	4	1	1	2	2	2					9	1	1							2	1
2011	65	M	6	4	2	2	2	9	1	1	2	2	2					1	9	2	5						1	1
2011	8	M	6	4	1	2		5	1	1	2	2	2						2	1	2						2
2011	19	F	5	4	5	1	2	6	1	1	2	2	2					9	9	1							2	1
2011	16	M	6	4		1	1	9	1	2	2	2	2					1	9	1							2	1
2011	7	F	6	4		2	2	9	1	1	2	2	2					9	9	1	2						2	1
2011	49	M	6	4		2	2	4	1	2	2	2	2					9	9	1	4						1	1
2011	45	M	6	4		2	1	99	1	1	2	2	1	2	2	1	2	1	2	1	4						1	1
2011	21	M	6	4		1	6	9										1	9	1							2	1
2011	34	F	5	4	3	1	1	5	1	2	2	2	2					1	9	1							2	1
2011	9	M	6	4	1	1	1	6	1	2	2	2	2					1	9	1							2	1
2011	65	F	5	4	3	2	2	4	1	1	2	2	2					9	1	1	4						2	1
2011	9	M	6	4		1	1	7	1	1	2	2	2					9	9	1	5						2	1
2011	8	M	6	4	9	1	1	9	1	1	2	2	2					9	2	1							2	1
2011	39	F	6	4	0	2	4	9	1	1	2	2	2					2	9	1							2	1
2011	46	M	6	4		1	1	9										1	9	1	3						1	1
2011	60	M	6	4		1	3	9	1	1	2	2	2					9	9	2	2
2011	44	M	6	4	1	1	2	2	1	1	2	2	2					9	1	2	3						1	1
2011	26	F	5	4		1	2	4	1	1	2	2	2					1	9	1	3						1	1
2011	50	F	5	4		1	1	9	1	2	2	2	2					1	2	2	7						1	1
2011	53	M	6	4	1	2	1	4	1	1	2	2	2					1	9	1	3						1	1
2011	39	M	6	4	9	1	1	4	1	1	2	2	2	1	2	2	2	9	9	2							1	1
2011	35	F	5	4	2	1	3	8	1	2	2	2	1						2	1							1
2011	68	M	6	5	2	2	2	9	1	1	1	2	2					1	2	1	2						1	1
2011	38	M	6	5	9	1	2	99	1	2	2	2	2	2	2	2	2	9	9	9							9	1
2011	19	M	6	5	1	2	5	2						2	2	2	1	1	1	1		1	2				9
2011	36	M	6	2	1	2	3	5	1	1	2	2	2	2	2	1	2	9	9	2	3							1
2011	33	F	5	4	6	1	4	6	1	1	2	2	2					9	1	1							2	1
2007	25	M	6	4		1	9	2	1	2	2	2	2					9	9	1							2	1
2011	47	M	6	1	0	1	2	4	1	1	2	2	2					9	9	1							1	1
2010	8	F	6	1	3	1	3	5										9	9	9							2	1
2011	32	M	6	4	1	2	5	9	1	2	2	2	2					1	9	1							2	1
2011	23	M	6	4	9	2	9	4	1	1	2	2	2	2	2	1	2	2	9	2	5						2	1
2011	4	M	6	9	10	1	3	4										9	9	1							2	1
2011	65	M	6	4	1	2	2	4	1	1	2	2	2					9	9	1							1	1
2011	58	F	5	4	2	1	1	4	1	1	1	2	2					9	9	2	2						2	1
2010	30	M	6	4	3	2	2	9	1	1	2	2	2					9	2	3	10
2011	62	M	6	4	3	2	3	4	1	1	2	2	2					9	9	1							1	1
2011	2	F	6	4	10	2	2	6	2	2	2	2	1					1	9	1							2	1
2011	27	M	6	4	1	1	1	2										1	2	1							2	1
2011	68	M	6	4	1	2	1	9	1	2	2	2	2					1	2	1							2	1
2011	24	M	6	4	9	2	1	5	1	1	2	2	2					1	9	2	5						2	1
2011	16	M	6	4	3	2	2	4	1	1	2	2	2					9	2	1	2						2	1
2011	36	F	6	4		1	1	3	1	2	2	2	2					1	9	1	3						1	1
2011	9	F	6	4	9	1	1	2	1	1	2	2	2	2	2	1	2	9	9	1	2						2	1
2011	42	M	6	4	3	1	6	9	1	1	1	2	1					9	1	1							2	1
2012	13	F	5	1	2	1	2	5	1	2	2	2	2					9	9	1	2						2	1
2012	50	M	6	1	6	1	2	4	1	1	2	2	2					9	9	2	2						2	1
2011	66	M	6	4	1	1	1	5	1	1	2	2	1					1	9	1							2	1
2011	15	M	6	4	2	1	1	5	1	1	2	1	2					9	9	1		2	1				2	1
2011	46	F	5	4	2		6	10	1	1	2	2	2					1	2	1		2	2				2	1
2011	49	M	6	4	1	2	2	9	2	2	2	2	1					1	2	1							2	1
2011	52	M	6	4	1	2	5	4						2	2	1	2	9	2	1							2	1
2011	38	F	5	4	1	1	1	5										9	9	1							2	1
2011	46	M	6	4	1	2	2	9	2	2	2	2	1					1	2	1							2	1
2011	72	M	6	4	1	2	1	4	1	1	2	1	2					9	2	1							2	1
2012	30	M	6	4	2	2	2	5	1	1	2	2	2					9	9	1							1	1
2011	41	M	6	1		2	2	9	1	2	2	2	2					9	9	1	2						1	1
2012	32	F	5	4	3	2	2	4	1	2	2	2	2					9	9	1	2						2	1
2012	20	M	6	4	9	1	2	4	1	1	2	2	2					9	1	1							2	1
2011	32	M	6	4	6	1	2	4	1	1	2	2	2					1	2	2	5						2	1
2012	2	M	6	4	10	2	5	8	1	2	2	2	2					1	9	2							2	1
2012	45	M	6	4		1	6	8	1	2	2	2	2						2	1							1	1
2012	67	M	6	4	2	2	2	4	1	1	2	2	2					9	9	1							2	1
2012	62	M	6	4	1	1	2	10	1	2	2	2	2					1	9	1							1	1
2012	2	F	6	4	10	2	1	4										9	9	2	3							1
2012	6	F	6	5	10	2	1	9	1	2	2	2	2					9	9	1							2	1
2012	11	F	5	4	1	1	2	4	1	1	2	2	2					1	9	2	3						2	1
2012	18	M	6	4	2	2		8	1	1	2	2	2					9	9	2	1						1	1
2012	38	M	6	4	3	1	3	4	2	1	2	2	2					9	9	1	2						2	1
2012	47	F	5	4	9	1	3	5	1	1	1	2	2					9	9	1	5						2	1
2012	44	M	6	4	1	1	3	9	1	2	2	2	2					9	1	1							2	1
2012	37	M	6	4		2	1	4	1	2	2	2	2					1	9	1							1	1
2012	25	F	5	4	9	1	1	4	1	2	2	2	2					9	9	1							2	1
2012	35	F	5	4	9	1	2	4	1	1	2	2	2					9	9	1							2	1
2012	1	M	6	4	10	1		99	1	1	2	2	2						9
2012	58	M	6	4	9	1	5	9	1	2	2	2	1					9	9	1							9	1
2012	39	M	6	4	9	1	9	99											9	1							9	1
2012	23	M	6	4	9	1	1	2										9	9	1							1	1
2012	48	F	4	4	9	2	9	9	1	2	2	2	1					9	9	1							9	1
2012	31	M	6	4	9	2	2	99	1	2	2	2	2					9	9	1							1	1
2012	29	M	6	1	1	2	4	8										9	9	1							1	1
2012	72	M	6	4	9	1	2	3	1	1	1	2	1						1	1							1	1
2012	44	F	5	4		1	9	3	1	1	2	2	2						9	1							2	1
2012	45	M	6	4	9	1	9	9	1	2	2	2	2						9	1							2	1
2012	69	M	6	4	0		2	2	1	1	2	2	2					1	9	3	10						1	1
2012	31	M	6	4	9	1	1	9	1	2	2	2	2						9	1							2	1
2012	42	M	6	4	1	2	3	6	1	1	2	2	2					9	9	1							1	1
2012	14	F	6	4	1	2		3	1	2	2	2	2					2	9	1	2						2	1
2012	25	F	5	4	9	1	1	4	1	1	2	2	1						9	1							2	1
2012	64	M	6	9		1	1	99										9	9	1							2	1
2012	40	M	6	1	3	1	2	5	1	1	2	2	2					9	9	1							1	1
2012	16	M	6	9	9	2	2	3	1	1	2	2	1						9	1							2	1
2012	22	M	6	4	9	1	1	5	1	1	2	2	2						9	1							2	1
2012	52	M	6	4	9	1	6	6	1	1	2	2	2					9	9	1							2	1
2012	53	F	5	4	5	1	1	4	1	1	2	2	2					1	1	1							2	1
2012	61	M	6	4		1	1	5										1	9	1							1	1
2012	36	M	6	4	4	2	2	8	1	1	2	2	2					1	2	1							1	1
2012	43	F	5	5		2	1	5	1	1	2	2	2	1	2	2	2	1	9	1							2	1
2012	42	M	6	4	1	2	1	5	2	1	2	2	2					9	9	1							1	1
2012	5	M	6	4	10	2	1	10	1	2	2	2	2					9	9	1							2	1
2011	71	M	6	1	1	1	1	4										1	9	1							2	1
2008	68	M	6	4	0	1	1	5	1	1	2	2	2					1	1	1	4						1	1
2012	34	M	6	4		1	2	3	1	2	2	2	2						9	1	2						1	1
2012	57	F	5	4	2	2	4	4	1	1	2	2	2					9	1	1							2	1
2012	36	F	5	4	9		4	4	1	1	2	2	2						9	1							2	1
2012	61	M	6	9		1	6	9	1	1	2	2	2					9	9	1		1	2				2	1
2011	25	M	6	5	1	2	1	4	1	1	2	2	2					9	9	1							1	1
2012	48	F	5	3	0	2	5	4	1	1	2	2	2					1	9	1							2	1
2012	9	F	6	4	1	2	2	5	1	1	2	2	2					9	9	1							1	1
2012	41	F	5	4	2	2	2	10	1	1	2	2	2					9	9	1							1	1
2012	17	M	6	9		1	2	9										9	9	1							9	1
2012	31	M	6	4	2	2	1	5	1	1	2	2	2						9	1							2	1
2012	37	M	6	4	9	2	2	9										9	9	1							2	1
2012	32	M	6	4	9	2	9	9	1	2	2	2	2					9	9	1							2	1
2012	39	M	6	4	9	1	2	9	1	2	2	2	2					9	9	1							2	1
2012	26	M	6	4		2	2	2	1	2	2	2	2					1	9	1							1
2012	34	M	6	4	1	2	3	4	1	2	2	2	2					1	9	1	2						2	1
2012	46	M	6	4	1	2	3	4	1	1	2	2	2					9	1	1							1	1
2012	43	M	6	4	2	2	2	10	1	2	2	2	2					9	9	2	3						1	1
2012	45	M	6	1	3	2	2	10	1	1	2	2	2					9	9	1							1	1
2012	36	F	5	1	3	2	1	10	1	1	2	2	2					9	9	2	3						1	1
2012	24	M	6	1	6	1	6	8	1	1	1	2	2						9	1
2011	14	F	6	5		2	1	5	1	1	2	2	2					2	2	1							2	1
2012	43	F	5	4		2	2	6	1	1	2	2	2					1	1	1							1	1
2012	11	M	6	4	3	2	1	4	1	1	2	2	2					1	1								2	1
2012	38	M	6	4		2	2	10	1	1	2	2	1					1	9	2	3						1	1
2012	18	M	6	4		2	2	10	1	1	2	2	2					1	1	1							1	1
2012	75	M	6	4	9	2	3	9	1	1	2	2	2						9	1							2	1
2012	36	F	5	4	1	2	1	7	1	1	2	2	2					9	9	1	3						2	1
2012	32	M	6	4	1	1	1	9	1	1	2	2	2					9	2	1							2	1
2012	46	F	9	5		2	1	4	1	1	1	2	2					2	9	1	1						2	1
2012	62	M	6	4	9	1	1	4	1	1	2	2	2					9	1	1							1	1
2012	34	M	6	4	3	1	1	9	1	2	2	2	2					9	9	1							2	1
2012	35	F	5	4	9		1	9	1	1	2	2	2						9	1							1	1
2012	51	M	6	4	9	1	1	4	1	1	2	2	2						9	1							2	1
2012	73	F	5	4	9		3	9	1	1	2	2	2						1	1							2	1
2012	53	F	5	5	1	2	2	10	1	2	2	2	2					9	9	1							2	1
2012	5	M	6	5	10	2	2	4	1	1	2	2	2					9	9	1							2	1
2012	45	M	6	5		2	9	4	1	1	2	2	2					1	2	1							2	1
2012	34	M	6	4		2	2	4	1	1	2	2	2					1	2	2	3						1	1
2012	59	M	6			2	3	8	1	1	2	2	2					1	2	2	5						1	1
2012	10	M	6	4	1	2	1	4	1	1	2	2	2					1	2	1							2	1
2012	55	M	6	4		1	1	2	1	1	2	2	2					1	2	1							1	1
2012	17	M	6	4	5	1	3	4	1	1	2	2	2						2	1							1	1
2012	46	M	6	4		2	2	9	1	1	2	2	2					1	2	2							1	1
2012	33	M	6	4	4	1	1	4	1	1	2	2	2					1	2	1							2	1
2012	46	M	6	4		2	2	9	1	1	2	2	2					1	2	2	5						1	1
2012	28	M	6	4		2	2	9	1	1	2	2	2					1	3	1	2						1	1
2012	46	F	5	5		2	1	9	1	2	2	2	2						9	1							2	1
2012	41	M	6	4	3	1	3	10	1	1	2	2	2					9	9	2	7						1	1
2012	30	F	5	4	4	1	1	9	1	2	2	2	2					1	2	1	5						2	1
2012	57	M	6	4	9	1	1	4	1	1	2	2	2						9	1							2	1
2012	46	F	5	4	9	1	2	4	1	1	2	2	2						9	1							2	1
2012	62	M	6	4	1	2	4	5	1	1	2	2	1					9	9	1							1	1
2012	63	M	6	4	3	2	1	2	1	1	2	2	2					9	9	1							1	1
2012	27	M	6	4	3	1	6	1	1	1	2	2	2					9	2	1							1	1
2012	53	M	6	4	9	1	3	4	1	1	2	2	2					1	9	2	5						2	1
2012	36	M	6	4	9	1		9	1	1	2	2	2						9	1							2	1
2012	45	M	6	1	2	2	2	4	1	1	2	2	2					9	9	2	3						1	1
2012	27	F	5	2	3	2	2	9	1	1	2	2	2					9	9	1							1	1
2012	16	M	6	4	2	2	6	7	2	1	2	2	2					9	9	2	2						1	1
2012	33	M	6	4	9	1	1	6	1	2	2	2	1						9	1							2	1
2012	71	F	5	4	9		2	9	1	1	2	2	1					9	9	1							2	1
2012	35	F	5	4	9	1	1	4	1	1	2	2	1						9	1							2	1
2012	42	F	5	4	2	1	1	9	1	1	2	2	2					9	9	1							1	1
2012	10	M	6	4	2	1	2	1	1	2	2	2	2					9	9	2	2						2	1
2012	19	M	6	9	9	1	9	99										9	9	9							9	9
2012	7	M	6		1	1	1	9	1	1	2	2	2					9	9	1							2	1
2012	2	F	6	4	10	1	1	9	1	1	2	2	2					9	9	2							2	1
2012	9	M	6	4		1	5	6	1	2	2	2	2					9	9	1							2	1
2012	3	F	6	5	10	2	3	9										9	9	1							2	1
2012	65	M	6	4	1	1	4	10	1	2	2	2	2					1	9	1	4						1	1
2012	24	F	5	5	0	2	1	8	1	2	2	2	2					1	9	1							1	1
2012	2	F	6	4	10	1	1	4	1	2	2	2	2					9	1	1							2	1
2012	21	F	5	1	3	1	1	4	1	1	2	2	2					9	1	1							2	1
2012	32	F	5	1	6	1	1	4	1	1	1	2	2						2	2	5
2012	44	M	6	5	1	1	2	4	1	1	2	2	2					1	2	2	5						1	1
2012	19	M	6	4	3	2	2	8	1	2	2	2	2					9	9	1							2	1
2012	14	M	6	4	1	1	1	7	1	1	2	2	2					1	9	1							2
2012	46	M	6	4	4	2	3	4	1	1	2	2	2					1	1	1							1	1
2012	30	M	6	4	4	2	2	4	1	1	2	2	1					1	1	1							2	1
2012	15	F	5	2	4	2	3	9	1	1	2	2	2					1	1	1							2	1
2012	29	M	6	4	4	2	2	2	1	1	2	2	2	1	2	2	2	1	1	1							1	1
2012	16	M	6	4		2	2	2	1	1	1	2	2					1	1	1							1	1
2012	43	M	6	4		2	1	4	1	1	2	2	2					1	1	1							1	1
2012	8	F	6	4	1	1	2	5	1	2	2	2	2					1	2	1							2	1
2012	23	M	6	4	4	1	1	4	1	2	2	2	2					1	2	1							2	1
2012	16	F	5	1	5	1	1	10	1	2	2	2	2					9	9	1	2						2	1
2012	28	M	6	4	9	1	2	8	1	1	2	2	2					2	9	2	4						2	1
2012	31	M	6	4	9	1	3	9	1	1	2	2	2						9	1							2	1
2012	16	M	6	5	4	2	2	9	1	1	1	2	2					1	2	1	2						1	1
2012	1	M	6	4	10	2	3	10	1	2	2	2	2					1	9	2	3						2	1
2012	32	F	5	4	0	2	2	10	1	1	2	2	2	2	2	2	2	9	2	1	5						1	1
2012	9	F	6	4	1	2	2	5	1	1	2	2	2					9	9	1	1						2	1
2012	57	M	6	4	9	2		1	1	1	2	2	2						9	1							2
2012	26	F	5	4	9	1	1	2	9	9	9	9	1						9	1							2
2012	30	M	6	4	9	1	1	9											9	1							9
2012	42	F	5	4	9	1	1	4	1	2	2	2	2						9	1							2	1
2012	64	F	5	5		2	5	7	1	1	2	2	2	2	2	1	1	9	9	2	4						2	1
2012	62	M	6	5		1	9	8	1	2	2	2	2					9	2	1							1	1
2012	12	F	5	4	3	1	2	4	1	2	2	2	2					9	9	1							2	1
2012	44	M	6	4	3	1	1	4										1	9	2	2						1	1
2012	38	M	6	4	1	1	3	8	1	1	2	2	2					1	1	1	5						1	1
2012	62	F	5	5	0	2	1	5	1	2	2	2	2					1	1	1							2	1
2012	9	M	6	4	1	1	1	4										1	9	1	5						2	1
2012	74	M	6	4	0	1	2	10	1	1	2	2	2					9	9	9	5						2	1
2012	24	F	5	4	9	1	6	7	1	1	2	2	2						9	1							9
2012	69	M	6	4	9	1	1	9	1	2	2	2	2						9	1							9
2012	48	F	5	4	9	1	2	1											9	1							9
2012	20	F	5	4	9	1	3	4	1	2	2	2	2					9	9	1							9
2012	6	F	6	4	10	1	1	4	1	2	2	2	2					1	2	1							2	1
2012	37	M	6	4		2	2	4	1	1	2	2	2	2	2	1	2	1	2	2	2						1	1
2012	53	M	6	4	4	2	2	4	1	1	2	2	2					1	2	1	2						1	1
2012	48	M	6	4	4	2	1	4	1	1	2	2	2					1	1	1							2	1
2012	51	F	5	4	4	2	2	4	1	2	2	2	2					1	1	1	2						1	1
2012	69	M	6	4	4	2	2	4	1	1	2	2	2					1	1	1							1	1
2012	43	M	6	4	9	1		9										9	9	1							2	1
2012	26	M	6	1	3	2	1	5	1	1	2	2	2					9	9	1	3						1	1
2012	33	M	6	5	6	2	2	10	1	1	2	2	2					9	1	1		2	2				1	1
2012	54	M	6	4	3	2	3	4	1	1	2	2	2					9	9	2							2	1
2012	53	M	6	4	0	1	2	8	1	1	2	2	2						9	2	4						1	1
2012	61	M	6	4	4	2	2	4										1	2	1							1	1
2012	62	F	6	2	4	2	1	4	2	1	2	2	2					1	9	1							2	1
2012	43	F	5	4	1	2	3	10	1	1	2	2	2	1	2	2	2		9	2	3
2012	7	M	6	4		2	3	9	1	1	1	2	2	2	2	2	1	2	9	2	6	2	2	1	2	1	2	1
2012	52	M	6	4	9	1	5	4	1	1	2	2	2						9	1							9	1
2012	37	M	6	4	9	1	2	9	1	1	2	2	2						9	2							2	1
2012	35	M	6	4	9	1	6	6	1	2	2	2	1						9	1							2	1
2012	20	F	5	4	9	1	1	9	1	1	2	2	1					1	9	1							2	1
2012	45	M	6	4		1	1	4	1	1	2	2	2	1	2	2	2	9	9	2	5						2	1
2012	42	M	6	4	3	2	5	1										1	9	2	5						1	1
2012	11	F	5	4	1	1	3	1	1	1	2	2	2						2	2	4						2	1
2012	22	M	6	5	5	1	1	9	1	2	2	2	2					9	9	1	4						2	1
2012	4	F	6	4	10	1	1	4	1	1	2	2	2					9	1	1							2	1
2012	6	F	6	4	10		2	5	1	1	2	2	2					9	2	2	5						2	1
2012	45	M	6	4	1	1	2	4	1	1	2	2	2					9	9	1	2						2	1
2012	6	M	6	4	2	1	1	9	1	2	2	2	2					9	2	1	5						2	1
2012	1	M	6	5	10	2	1	99	1	1	2	2	2					9	9	1							2	1
2012	37	M	6	4	3	1	2	4	1	1	2	2	2					9	9	2	4						1	1
2012	48	F	5	4	3	1	3	9	1	1	2	2	2						2	3	4						2	1
2012	61	M	6	4	9	2		4	1	2	2	2	2						9	1							2
2012	59	F	5	4	9	1	1	7	1	1	2	2	2	2	2	1	2	9	9	1	2						2	1
2012	52	F	5	4	9	1	9	9	1	1	2	2	2						9	1							2	1
2012	21	F	5	4	9	2	3	4	1	2	2	2	2	2	2	1	2		9	1							9	1
2012	33	M	6	4	9		6	7										9	9	1							2	1
2012	52	F	5	4	4	2	2	3	1	1	2	2	2					1	2	2		2	1				2	1
2012	3	M	6	4	10	2	2	7	1	1	2	2	2					1	2	1							2	1
2012	68	F	5	4	4	2	2	4	1	1	2	2	2					1	2	1							2	1
2012	76	M	6	4		1	1	9										2	9	1	2						2	1
2012	20	M	6	4	5	2	5	9	1	1	2	2	2					9	9	1	5						2	1
2012	8	M	6	4	1	1		8	2	1	2	2	2					1	9	1	5						2	1
2012	21	M	6	4	4	2	2	4	1	1	2	2	2					1	2	2							1	1
2012	15	F	5	4	3	1	1	4	1	1	2	2	2	2	1	2	2	2	2	3							2	1
2012	5	F	6	4	10	2	2	4						1	9	9	9		2	1							2	1
2012	26	M	6	4	4	2	2	4	1	1	2	2	2	1	2	2	2	1	1	1							1	1
2012	33	M	6	4	2	1	2	4	1	1	2	2	2					1	9	1	2						1	1
2011	40	M	6	4	2	1	2	4	1	1	2	2	2						9	1							1	1
2012	45	M	6	4	3	2	2	9	1	1	2	2	2					1	9	2	4						1	1
2008	88	M	6	4	0	1	2	9	1	2	2	2	2					1	9	1							1
2011	72	M	6	4		1		4	1	1	2	2	2	2	2	1	2	9	9	1	2						1	1
2010	41	M	6	4	0	2	4	4	1	1	2	2	9						9
2008	39	F	5	4	6	1	1	4	1	1	2	2	2					9	9	1							2	1
2008	19	M	6	4	3	1	1	1										9	9	1	2						2	1
2008	20	F	5	4	3	1	1	4	1	2	2	2	2					9	9	2	2						2
2012	14	F	5	4	3	1	6	8	1	1	1	1	2					1	9	1							2	1
2008	39	M	6	4	4	1	1	4										9	9								1	1
2008	44	M	6	4	1	2	2	9	1	2	2	2	2					1	9	1							1	1
2007	51	M	6	4	1	1	1	9	1	2	2	2	2					9	9	1							1	1
2008	5	F	6	4	10	1	1	9	1	2	2	2	2					9	9	1
2012	25	M	6	4	3	1	1	10	1	1	2	2	2					1	9	2	2						1	1
2009	52	M	6	1	0	2	6	8	1	2	2	2	2					1	9	1							1	1
2007	47	M	6	4	1	1	2	10	1	1	2	2	2					1	1	1							1	1
2011	25	F	6	4	6	2	3	4										9	1	2	3						2
2007	22	M	6	4	1	1	2	2	1	2	2	2	2					1	9	2	4						1	1
2010	59	M	6	4	1	2	3	7	1	2	2	2	2					1	1	2	5						1	1
2010	61	M	6	4	2	2	2	5	1	1	1	2	2					9	9	1	1						2	1
2011	24	M	6	4	4	1	2	3	1	1	2	2	2					9	9	1							2	1
2011	49	M	6	1	2	2	2	10	1	2	2	2	2					9	9	2	3						1	1
2012	29	M	6			1	2	9	1	2	2	2	2					2	2	1	2							1
2012	13	F	5	4		1	1	9	1	1	2	2	2					9	9	1	4						2	1
2012	73	M	6	4	6	1	2	4	1	2	2	2	2					9	9	1							2	1
2012	32	M	6	4		2	2	9	1	1	2	2	2					2	9	2	4						1	1
2011	45	M	6	1	0	1	2	2										1	9	1	1						2	1
2012	9	F	6	4	1	1	1	9	1	1	1	2	2	2	2	1	2	2	9	2	5						2	1
2012	45	M	6	4	1	2	2	4	1	1	2	2	2					1	9	1	4						1	1
2012	6	F	6	4	10	1	2	2	1	2	2	2	2					9	9	1							2	1
2012	54	M	6	4	3	1	2	4	1	1	2	2	2					9	9	2	3						1	1
2014	35	M	6	2	02	1	1	09	1	2	2	2	2						1	1	2						2	1
2014	40	F	6	4	09	2	2	09										1	9	1	10						1	1
2014	38	M	6	5	01	2	3	09	1	1	2	2	2					9	9	1	2						1	1
2013	30	M	6	1	01	1	2	03	1	1	2	2	2					9	9	1							2	1
2013	19	M	6	1	06	1	1	05	1	2	2	2	2					9	4	1							1	1
2013	32	M	6	4	01	1	5	05	1	1	2	2	1	1		2	2	9	9	2	3						2	1
2013	7	M	6	4	01	1	2	05										1	2	1							2	1
2013	14	F	5	4	05	1	6	10	1	1	2	2	1					9	9	1							2	1
2013	26	M	6	4	04	1	2	04	1	1	2	2	2					9	1	1							1	1
2013	17	M	6	4	03	1	1	04	1	1	2	2	1					1	9	2							2	1
2013	23	M	6	4		1	2	09	1	2	2	2	2					1	9	1							2	1
2013	25	M	6	4	09	1		04	1	1	2	2	2						9	2	4						2	1
2013	5	M	6	4	10	1	1	02	1	2	2	2	2					1	2	1							2	1
2013	7	M	6	4	01	1	1	04	1	2	2	2	2					1	2	1							2	1
2013	68	M	6	4	04	1	1	01	1	2	2	2	2					1	2	1							1	1
2013	12	M	6	4	09	1	6	09	1	1	2	2	2						9	1							2	1
2013	22	M	6	4	06	1	4	06	1	1	2	2	2	2		2	1	2	2	2	5						2	1
2013	25	M	6	4		1	2	10	1	1	2	2	2					1	9	1							2	1
2013	62	M	6	4	00	1	2	01	1	1	2	2	2					9	4	1							1	1
2013	13	M	6	4	03	1	1	09	1	2	2	2	2					1		2							2	1
2013	76	F	6	4	01	2	2	09	1	1	2	2	2					1	1	1	5						2	1
2013	5	M	6	4	10	1	1	04	1	2	2	2	2					1	9	1							2	1
2013	24	M	6	4	02	2	4	04	1	1	2	2	2					1	9	1							2	1
2013	98	F	5	5	00		1	05	1	1	2	2	2					9	9	1	2						2	1
2013	35	F	5	1	05	1	4	09	1	1	2	2	2					9	4	1							2	1
2013	8	M	6	5	01	2	1	05	1	1	2	2	2					9	9	1							2	1
2013	34	M	6	4	09	1	2	04	1	1	2	2	2					1	9	1							2	1
2013	1	F	6	4	10	1	1	05	1	1	2	2	2					9	9	1							2	1
2013	34	M	6	4	06	2	2	09	1	2	2	2	2					1	9	1							2	1
2013	53	M	6	4	01	2	6	09	1	1	1	2	2					1	9	1							2	1
2013	22	M	6	4	01	1	3	03	1	1	2	2	2						2	1	2						2	1
2013	44	F	5	4	09	1	6	02	1	1	2	2	2					9	9	1							2	1
2013	62	F	5	4	09	1	3	09	1	2	2	2	2					9	9	1							2	1
2013	26	M	6	4		1	4	09	1	1	2	2	2						1	1	2						1	1
2013	72	F	5	4	04	2	1	08	1	1	2	2	2					9	2	1	1						2	1
2013	33	M	6	4	00	1	3	04	1	1	9	9	2						4	2	4						1	1
2013	38	M	6	4	07	1	1	09	1	1	2	2	2					9	4	1	3						2	1
2013	5	M	6		10	1	1	04	1	1	9	9	9					9	9	1
2013	25	F	5	4	09	2	2	04	1	1	1	2	2					9	4	2	5						2	1
2013	67	M	6	4	09	1	1	04	1	1	2	2	2					9	9	1							2	1
2013	58	M	6	4	09	1	3	09	1	1	2	2	2					9	9	1							2	1
2013	39	M	6	9			1	99										9	4	1							2	1
2013	74	M	6	4	04	1	2	04	1	1	2	2	2					1	3	1							2	1
2013	5	M	6	4	10	2	2	09	1	1	2	2	2	2		2	2	1	1	2							2	1
2013	55	F	5	4	04	2	2	02	1	1	2	2	2					1	2	1							2	1
2013	49	M	6	4	04	2	2	09	1	1	2	2	2					1	1	1							1	1
2013	72	M	6	5	00	2	9	04	1	1	2	2	2					9	4	1							1	1
2013	14	M	6	4	03	2	1	08	1	1	2	2	2						9	1							9	1
2013	35	F	5	4	09		1	09										9	9	1							2	1
2013	31	M	6	4		2	3	06	1	1	2	2	1						4	1	2						1	1
2013	1	M	6	4	10	2	1	02	1	2	2	2	2	2		2	2	1	1	1							1	1
2013	36	M	6	5	09	2	1	05	1	1	2	2	2					1	2	1							1	1
2013	43	M	6	4	07	1	1	04	1	1	2	2	2					9	9	1	4						2	1
2013	41	M	6	4	09	1	1	04	2	1	2	2	2					9	9	1							2	1
2013	48	M	6	4	09	1	1	03	1	1	1	2	9					1	9	1	2
2013	27	M	6	4	02	2	2	04	1	1	1	2	2					9	2	2	5						2	1
2013	4	M	6	5	10	2	5	09	1	1	2	2	2					9	2	1	2	1	2				2	1
2013	29	M	6	4	03	1	3	01										1	4	1							2	1
2013	62	F	5	4	09		9	04	1	1	9	9	9					9	9	1							2	1
2013	58	M	6	4	03	2	2	09	1	1	2	2	2					1	9	1	4						2	1
2013	34	F	5	4		2	2	09	1	1	2	2	2					9	4	1							1	1
2013	13	F	6	1		2	2	09	1	1	2	2	2					9	4	1	2						2	1
2013	46	M	6	1	01	1	1	10										9	9	1	4						2	1
2013	48	M	6	4	09	1	1	09	1	2	2	2	2					9	9	1							2	1
2013	49	M	6	5	00	2	1	04	1	1	2	2	2						9	1							1	1
2013	43	M	6	5	01	2	1	04	1	2	2	2	2					9	2	1							1	1
2013	24	M	6	4		1	3	02	1	2	1	2	2						4		1						1	1
2013	38	F	5	4	00	1	3	04	1	1	2	2	2					9	2	2	3						1
2013	4	M	6	4	10	1	2	09	1	1	2	2	2	2		1	2	2	9	2	2						2	1
2013	58	F	6	4	02	2	2	05	1	1	2	2	2					9	9	1	2						1	1
2013	39	M	6	4	01	1	1	04	1	2	2	1	2					9	9	1							2	1
2013	11	M	6	9	09	1	9	04	1	2	2	2	2					9	9	1							2	1
2013	5	M	6	4	10	2	3	09	1	1	2	2	2					1	9	1							2	1
2013	46	M	6	4	09	1	4	03	1	1	2	2	2					1	9	1							2	1
2013	21	M	6	4	09	1	5	07	1	2	2	2	1					9	9	1							2	1
2013	37	M	6	4	09	1	6	04	1	2	2	2	2					9	9	1							2	1
2013	14	M	6	4	09	1	1	01	1	1	2	2	2					9	9	1							2	1
2013	42	F	5	4	09	1	3	07	1	1	2	2	2	2		1	2	9	9	1							2	1
2013	32	M	6	4	09	1	1	99										9	2	1							1	1
2013	21	F	5	4	09	1	1	99	1	1	2	2	2					9	9	1							1	1
2013	74	M	6	4	09	2	9	04	1	1	2	2	2					9	9	1							2	1
2013	48	M	6	5	02	1	2	05	1	9	9	9	9						9	1							2
2013	58	F	5			2	1	01	1	1	2	2	2					1	9	2								1
2013	69	M	6			1	1	99	1	1	2	2	1					1	9	1				1	2	2	1
2013	17	M	6	3		2	2	04	1	1	2	2	2					1	9	1	3	1	2	2	2	2	2
2013	68	F	5	4	00		1	05	1	2	2	2	2						2	2							1	1
2013	36	F	6	3	04	2	1	05	1	2	2	2	2					9	9	3	2						1
2013	37	M	6	5	00	2	3	02	1	1	2	2	9					9	1	1							1	1
2013	30	F	5	5		2	1	04	1	2	2	2	2					9	1	1							2	1
2013	35	M	6	4	09	2	6	08	1	1	2	2	2					1	9	1	3						2	1
2013	69	F	5	9	09	2	2	04	1	1	2	2	2					9	9	1							2	1
2013	36	F	5	9	09	1	2	04	1	2	2	2	2					9	9	1							2	1
2013	5	M	6	4	10	1	1	04	1	1	2	2	2					9	9	1							2	1
2013	23	F	5	4	09	1	6	99	1	1	2	2	2					1	9	1							2	1
2013	1	M	6	4	10	1	1	04	1	1	2	2	2					9	9	1							2	1
2013	10	M	6	4	09	1	3	99	1	1	2	2	2					9	9	1							2	1
2013	1	F	6	4	10	1	1	01										9	9	1							2	1
2013	36	F	5	4	09	1	5	09	1	2	2	2	2					9	9	1							2	1
2013	67	F	5	9	09	1	2	06	1	2	2	2	2					9	9	1							2	1
2013	7	M	6	4	09	1	1	01	1	1	2	2	2					9	9	1							2	1
2013	33	M	6	4	09	1	9	04	1	2	2	2	2					9	9	1							9	1
2013	48	F	5	4	09	1	2	99	1	2	2	2	2					1	9	1							9	1
2013	43	M	6	1	04	2	2	08	1	1	2	2	2					9	9	1	2						1	1
2013	43	F	5	4		1	4	04	1	2	2	2	2						4	2							2	1
2013	30	M	6	4	09	2	2	04	1	2	2	2	1	1		1	2	1	9	1							1	1
2013	41	M	6	4		1	4	04	1	1	2	2	2						2	1	2						1	1
2013	19	M	6	9	09		1	04	1	1	2	2	2					9	3	2							2	1
2013	55	F	5	4	06	1	2	05	1	1	2	2	1					9	1	2	4							1
2013	33	M	6	4	09	1	6	09	1	2	2	2	2					9	9	1							2	1
2013	11	F	5	4	09	2	2	04	1	1	2	2	2					9	1	1							2	1
2013	19	M	6	4	09		3	99	1	2	2	2	2					1	9	1							2	1
2013	52	M	6	4	09	1	1	05	1	2	2	2	2					9	9	1							2	1
2013	25	M	6	5	09	2	4	09	1	2	2	2	2					9	4	1	1						2	1
2013	17	M	6	4	02	2	3	09	1	2	2	2	2					1	9	1	1						2	1
2013	33	M	6	4		1	2	02	1	2	2	2	2					1	4	1							1	1
2013	25	F	5	4	06	1	1	10	1	1	2	2	2					1	9	2	3						1	1
2013	9	F	6	4	01	1	3	05	1	2	1	2	2						4	1							2	1
2013	13	M	6	4	03	2	3	09	1	1	2	2	2	1		2	2		4	2	4						2	1
2013	20	M	6	4		2	1	04	1	1	2	2	2					1	1	1							2	1
2013	27	F	5	5	04	1	1	04	1	1	2	2	2						1	2	2						2	1
2013	55	M	6	4	03	2	3	10	1	2	2	2	2						9	1	1						1	1
2013	56	F	5	5		2	2	01	1	1	2	2	2					1	9	1							2	1
2013	32	M	6	4	04	2	2	04	1	1	2	2	2					1	1	1							1	1
2013	11	M	6	4		1	1	04										1	1								2	1
2013	12	F	5	1		1	1	04	1	1	2	2	2					1	1	1							2	1
2013	50	F	5	4		1	1	04	1	1	2	2	2	2		1	2	1	1	1							2	1
2013	55	M	6	4		2	2	05	1	2	2	2	2					1	1	1							1	1
2013	35	F	5	4	06	2	2	09	1	2	2	2	1					1	4	1							2	1
2013	46	F	5	4	02	2	1	06	1	1	2	2	2	2		2	2	1	9								1	1
2013	69	F	6	3		2	2	09	1	2	2	2	2					9	2	1							2
2013	19	M	6	4		2	2	05	1	1	9	9	9	9		9	9	2	9	9							1	9
2013	61	M	6	4		2	3	08	1	9	9	9	9					1	4	2	2						1	1
2013	80	M	6	4	01	2	2	04	1	1	2	2	2					1	1	1							2	1
2013	23	M	6	4	03	1	1	09	1	1	2	2	2					9	1	2	5						2	1
2013	39	M	6	4		1	1	09	1	1	2	2	2						1	1
2013	67	M	6	4	09	1	1	04	1	1	2	2	2					9	9	1							2	1
2013	24	M	6	4	09		2	99	1	2	2	2	2					9	9	1							2	1
2013	8	F	6	4	09	1	1	04	2	2	2	2	1					9	9	1							2	1
2013	77	F	5	4	09	1	3	04	1	1	2	2	2					9	9	1							2	1
2013	27	M	6	4	09	1	1	04	1	2	2	2	2					9	9	1							2	1
2013	40	F	5	4	09	1	1	08	1	2	2	2	2					9	9	1							2	1
2013	44	M	6	4	09	1	2	03	1	1	2	2	2					9	9	1							2	1
2013	9	M	6	4	09		2	99	1	2	2	2	2					9	9	1							2	1
2013	15	F	5	4	09	1	1	04	1	2	2	2	2	2		1	2	9	9	1							2	1
2013	14	M	6	4	03	2		09	1	1	2	2	2						3	1	4						2	1
2013	16	M	6	4	03	2	2	09	1	1	2	2	2					9	1	1							1	1
2013	22	M	6	4	01	1	1	09	1	1	2	2	2					2	2	2							2	1
2013	1	M	6	4	10	2	3	04	1	1	2	2	2					1	4	2	2						1	1
2013	45	M	6	4		2	2	09	1	1	2	2	2					1	4	1							1	1
2013	56	F	5	4		2	2	04	1	1	2	2	2					1	4	1							2	1
2013	3	F	6	4	10	1	1	06										9	9	1							2	1
2013	19	M	6	1		2	5	04	1	1	2	2	1	2		1	2	1	1	2	3						1	1
2013	19	M	6	1			6	10	1	1	2	2	2					1	2	1		1	2				2	1
2013	25	M	6	4	03	1	1	08	1	1	2	2	2					1	4	1							1	1
2013	21	M	6	5	03	2	3	09	1	2	2	2	2					1	9	1							1	1
2013	61	F	5	4	01	1	2	10	1	2	2	2	2					9	4	1							2	1
2013	20	M	6	4	09	1	3	04	1	2	2	2	2					1	9	1							2	1
2013	1	M	6	4	10	1	1	07	1	1	2	2	2					1	9	1							2	1
2013	27	F	5	4		2	5	05										1	9	1							2	1
2013	17	F	6	5	00	2	9	02	1	1	2	2	2					9	9								1	1
2013	1	M	6	4	10	2	9	08	1	2	2	2	2					9	9	1							2	1
2013	47	M	6	4	09	1	1	09	1	1	2	2	2					9	9	1							2	1
2013	16	M	6	4		2	3	08	1	1	2	2	2					1	4	1							2	1
2013	27	M	6	5	03	2	2	09	1	1	2	2	2					9	1	1							2	1
2013	74	F	5	5	00	2	1	02	1	2	2	2	2					9	4	2							2	1
2013	43	M	6	4	00	2	1	04	1	1	2	2	2					9	9	1							1	1
2013	18	M	6	4	09	1	1	06										9	9	1							2	1
2013	41	M	6	4	02	1	1	10	1	1	1	2	2					1	1	2	1						2	1
2013	13	F	5	4	02	1	3	05	1	1	2	2	2					1	1	1							2	1
2013	43	M	6	4	02	1	2	04	1	2	2	2	2					1	1	1	4						2	1
2013	13	F	6	4		2	2	04	1	1	2	2	2					9	4	1							2	1
2013	55	M	6	4	02	1	4	08	1	1	2	2	2					1	1	2	2						1	1
2013	17	M	6	4	02	1	1	07	1	1	2	2	2					1	2	2	3						1	1
2013	34	F	5	4	05	1	2	10	1	2	2	2	2					1	4
2013	51	M	6	4		2	2	10	1	1	2	2	2					1	2	1							2	1
2013	21	F	5	4		2	2	10	1	1	2	2	2					1	1	1							2	1
2013	46	M	6	4		1	1	09	1	1	2	2	2					1	1	2							1	9
2013	25	F	1	4	05	2	2	06	1	1	2	2	2					9	4	2	2						1	1
2013	23	M	6	1	02	2	2	10										9	4	1							1	1
2013	22	F	6	1			1	04	1	1	2	2	2						9	1	2						2	1
2013	59	M	6	4	01	2	1	04	1	2	2	2	2					2	4	3	6						2	1
2013	13	M	6	4	09	1	9	04	1	2	2	2	2					9	9	1							2	1
2013	40	F	5	5	01	2	1	08	1	1	2	2	2	1		2	2	9	2	2							1	1
2013	17	M	6	4	05	1	2	04	1	1	2	2	2					9	1	1							1	1
2013	44	M	6	4		2	1	08	1	1	2	2	2					1	4	1							1	1
2013	26	M	6	4	09	1	1	01	1	1	2	2	1					9	9	1							2	1
2013	40	M	6	4	09	1	5	02	2	2	2	2	1					1	9	1							9	1
2013	25	M	6	5		2	1	05	1	1	2	2	2						9								2	1
2013	29	M	6	5	00	2	1	08	1	2	2	2	2						9	2							1	1
2013	19	M	6	4		2	2	04	1	1	2	2	2					1	1	1							1	1
2013	28	M	6	4		2	2	10	1	1	2	2	2					1	9	1							1	1
2013	12	M	6	4		2	1	04	1	1	2	2	2					1	1	1							2	1
2013	39	M	6	4	01	2	1	05	1	2	2	2	2					2	4	1	1						1	1
2013	57	F	5	4	01	2	2	05	1	1	2	2	2					9	4	2	2						1	1
2014	51	M	6	4		1	2	10											2		5						2	1
2013	9	M	6	4	02	1	3	09	1	1	2	2	2					1	1	1							1	1
2014	67	F	6	4	01	1	1	10	1	2	2	2	2					9	4	1							2	1
2013	53	M	6	4	09	1	1	09	1	2	2	2	2						3	1	5						2	1
2013	74	M	6	4		2	1	09	1	2	1	2	2					9	3	2							1	1
2013	47	M	6	4	02	2	3	09										9	2	2	8						2	1
2013	20	M	6	4	05	2	6	09	1	1	2	2	2					2	9	2	5						2	1
2013	62	M	6	4	01	2	4	09	1	2	2	2	2					9	1	1	2						1	1
2014	8	M	6	4		1	1	04	1	2	2	2	2					1	4	1							2	1
2014	74	F	5	5		1	2	04	1	1	2	2	2					1	2	2	5						1	1
2014	24	F	5	4	09	2	2	03	1	1	2	2	2					9	9	1							2	1
2014	15	M	6	4	09	1	2	04	1	2	2	2	1					1	9	1							2	1
2014	52	F	5	4	09	1	1	09	1	1	2	2	2					9	9	1							2	1
2014	19	M	6	4	09	2	4	03	1	2	2	2	2	2		2	2	9	9	2	5						2	1
2014	4	F	6	4	10	2	2	09	1	1	2	2	2					1	9	1							2	1
2014	37	M	6	4	01	2	3	09	1	1	2	2	2					1	1	1	5						1	1
2014	49	F	5	4	09	1	3	09	1	1	2	2	2					9	9	1							9	1
2014	33	M	6	4		1	1	04	1	1	2	2	2					1	1	1							2	1
2014	19	M	6	4		2	2	03	1	1	2	2	2					1	1	1							1	1
2014	37	M	6	4		2	2	05	1	1	2	2	2					1	1	1							2	1
2014	19	F	5	4		1	1	06	1	2	2	2	2					9	9	1							2	1
2014	20	F	5	4	02	1	1	09	1	2	2	2	2					1	4	1							2	1
2014	62	M	6	5		1	4	08	1	1	2	2	2						9	3	6						1	1
2014	23	M	6	4	09	2	3	04	1	2	2	2	2					9	9	1							9	1
2014	26	F	5	4	09	1	1	09	1	2	2	2	2					9	9	1							2	1
2014	3	M	6	4	10	2	9	05	1	2	2	2	2					1	9	1							2	1
2014	30	M	6	4	09	2	6	99										2	9	1							9	1
2014	38	F	5	4	09	1	4	09	1	2	2	2	1					9	9	1							2	1
2014	30	M	6	4	09	1	1	05	1	2	2	2	1					9	9	1							2	1
2014	62	M	6	4	03	2	2	10	1	2	2	2	2					9	1	1							2	1
2014	46	M	6	4	09	2	1	10	1	2	2	2	2					9	4	1							1	1
2014	27	F	5	4	06	1	1	05	1	1	2	2	2					9	4	1							1	1
2014	46	M	6	4		2	3	04	1	2	2	2	2					9	4	1							1	1
2014	2	F	6		10	2	1	04	1	1	2	2	2					9	9	1							2	1
2013	45	M	6	2	09	1	2	09	1	2	2	2	2					9	3	1	4						1	1
2013	39	M	6	4	01	1	2	08	1	1	2	2	2					1	3	2	4						2	1
2014	63	F	5	4	02	2	2	09	1	1	2	2	2						9	1							2	1
2014	8	M	6	4	01	1	1	09	1	1	2	2	2					9	3	1							2	1
2014	58	M	6	4	01	1	1	10	1	2	2	2	2					9	9	2	2						2	1
2013	27	F	5	4	02	2	4	04	1	1	2	2	2						1	1	1						1	1
2014	67	M	6	4	09		3	09	1	2	2	2	2					9	9	1							9	1
2014	39	F	5	4	09	1	1	09	1	1	2	2	1					9	9	1							2	1
2014	48	F	5	1	02		1	09	1	2	1	2	1						1	2	2						1	1
2014	19	M	6	4	09		2	99	1	9	9	9	9					1	9	1							2	1
2014	8	M	6	2	01	1	1	09	1	2	2	2	2					1	1	1							2	1
2014	20	F	5	4	03	1	1	04	1	1	2	9	1					1	2	3							2	1
2014	14	M	6	4		2	2	04	1	1	9	9	9					1	1	1							2	2
2014	18	M	6	4	04	2	2	04	1	1	9	9	9						9	1							2	1
2014	48	M	6	4	05	2	2	09	1	1	2	2	2					1	3	1							2	1
2014	35	F	5	4	03	2	3	04	1	2	2	2	2					1	3	1							2	1
2014	38	M	6	4	08	1	2	04	1	2	2	2	2					1	3	1							2	1
2014	37	F	6	4	02	2	6	07	1	2	1	2	2					9	2	1							1
2014	22	M	6	4	09	1	1	99	1	1	2	2	2					9	9	1							2	1
2014	52	M	6	4	09	1	6	09	1	2	2	2	2					9	9	1							2	1
2014	17	M	6	4	09	1	2	06	1	1	2	2	1					9	9	1							2	1
2013	11	M	6	4	01	1	6	04	1	2	2	2	2					9	9	1							2	1
2014	21	F	5	4	09	2	3	09	1	2	2	2	2					9	9	1							9	1
2014	34	M	6	4	09	1	1	09										9	9	1							9	1
2014	56	M	6	4	09	1	4	09	1	1	2	2	2					9	9	1							9	1
2014	49	M	6	4	09	2	4	99	1	2	2	2	2					9	9	1							2	1
2013	17	M	6	4		2	1	06	1	2	2	2	2					9	4	1							2	1
2014	24	M	6	4	03	1	2	08										1	4	1	4						1	1
2014	38	F	5	4		2	1	03	1	1	2	2	2					1	9	1							2	1
2014	19	F	5	4		2	2	10	1	1	2	2	2					1	4	1							2	1
2014	49	M	6	4		2	1	10	1	2	2	2	2					1	4	1							2	1
2014	57	F	5	4		2	2	04	1	1	2	2	2	2		1	2	9	2	2	3						1	1
2014	26	F	5	4	09	1	1	09	1	2	2	2	2					1	9	1							2	1
2014	31	M	6	4	09		3	08	1	1	2	2	2					1	1	1							2	1
2014	28	M	6	4	09	1	2	04	1	2	2	2	2					9	9	1							2	1
2013	63	M	6	5	00	2	2	09										1	4	2							2	1
2013	48	M	6	4	01	2	3	05	1	1	1	2	1					1	4	1							2	1
2014	34	M	6	4	09	1	1	09	1	2	2	2	1					1	1	1							2	1
2014	46	F	5	4	04	2	1	09	1	1	2	2	2					1	9	1							2	1
2014	13	M	6	4	03	1	6	04	1	1	2	2	2					9	4	2							2	1
2014	61	M	6	2	01	2	1	10	1	2	2	2	2					9	4	1							1	1
2014	9	M	6	4		1	2	04	1	2	2	2	2					9	4	1							2	1
2014	61	M	6	4	01	2	1	10	1	1	2	2	2					9	4	1							1	1
2014	17	M	6	4	02	2	3	09	1	2	2	2	2					2	9	3	10	2	2				1	1
2014	14	M	6	4	03	1	3	02	1	1	2	2	2					1	9	1	0						2	1
2014	44	M	6	2	09	2	1	09	1	2	2	2	2					9	9	1							1	1
2014	66	F	6	4	05	1	2	05	1	1	2	2	2					1	4	1							1	1
2014	43	M	6	4	00	1	1	03	1	1	2	2	2					9	4	1							1	1
2014	42	M	6	4	02	1		04	1	2	2	2	2					9	4	1							1	1
2013	37	M	6	4	04	1	2	04	1	1	2	2	2						9	1							2	1
2014	46	M	6	4		2	2	04	1	1	2	2	2					2	2	2	12						1	1
2013	63	F	6	4	09	2	6	04	1	1	2	2	2					9	4	2	5						1	1
2014	19	F	5	4	05	2	2	04	1	1	2	2	2					1	1	1							2	1
2014	49	M	6	4	04	2	1	09	1	1	2	2	2					1	3	1							1	1
2014	12	M	6	1	03	2	1	01	1	1	2	2	2					9	4	1							2	1
2014	29	M	6	4	08	1	1	01	1	1	2	2	2					9	9								2	1
2014	28	F	5	4	05	2	2	09	1	2	2	2	2					1	1	1							1	1
2014	35	F	6	4	03	1	2	05	1	1	2	2	2					9	1	1							2	1
2014	50	M	6	4	01	2	2	04	1	1	2	2	2	1		2	2	9	1	1							1	1
2014	51	M	6	4	01	2	3	04	1	1	1	2	2						2	2	5	1	1				1	1
2014	14	M	6	5	00	2		04	1	2	2	2	2					9	9								2	1
2013	41	M	6	5		2	5	04	1	2	2	2	2						4	1	2						2	1
2014	30	F	6	4	09	1	4	05	1	2	2	2	1					9	4	1							2	1
2013	46	F	6	4	02	1	3	09	1	1	2	2	2					9	4	2	5						1	1
2013	59	F	5	2		1	3	03	1	1	2	2	2					9	4	1							2	1
2013	32	M	6	4		2	3	09	1	2	2	2	2					9	4	1	2						2	1
2013	23	M	6	4	05	1	2	09	1	1	2	2	2	1		2	2	1	4	2	5						1	1
2013	40	F	5	4	06	2	1	09	1	2	2	2	2					9	4	1	5						1	1
2013	43	M	6	4		1	3	06										1	4	1							2	1
2013	28	M	6	4		2	3	04	1	1	2	2	2					9	1	3							2	1
2014	38	M	6	2	01	1	2	05	1	1	2	2	2					9	4	2							1	1
2014	10	M	6	4	01	1	1	04	1	2	2	2	2					9	4	1							2	1
2013	42	F	5	4		2	2	04	1	1	2	2	2	2		2	2	9	4	1							2	1
2014	70	M	6	4	01	2	1	04	1	1	2	2	2					9	4	2	2						1	1
2014	56	M	6	2		2	2	04	1	1	2	2	2	1		2	2	1	9	2	2						2	1
2013	52	M	6	4		1	1	07	1	1	1	1	2						2	1	2						2	1
2013	31	M	6	1	09	1	6	05	1	1	1	1	9					1	9	2	4						2	1
2014	60	F	5	4	04		2	04	1	1	9	9	9					1	1	2							2	1
2014	38	M	6	4	05	1	1	10	1	1	9	9	9	1		9	9	1	1	2							2	1
2014	37	F	5	4		2	3	05	1	1	9	9	9					1	4	1							1	1
2014	21	M	6	4	04		2	04	1	1	9	9	9					1	1	1							1	1
2014	60	F	5	4	03	1	3	08	1	1	1	1	1						1								2	1
2014	28	M	6	4	04	2	2	10	1	9	9	9	9					1	1	1							1	1
2014	64	F	5	4	04	2	2	05	1	1	9	9	9					1	1	1							1	1
2014	55	F	5	4	04	1	1	05	1	1	2	2	2					1	1	1							2	1
2014	37	F	5	4	04	2	2	03	1	1	2	2	2					1	1	1							2	1
2014	74	M	6	4	04	2	1	05	1	1	9	9	9					1	1	2							1	1
2014	21	F	1	4	05		1	04	1	1	2	2	2						4	1
2014	62	M	6	4				09	1	2	2	2	2						9	1
2014	38	M	6	4	09	2	4	09	1	2	2	2	2					9	4	1							2	1
2014	37	M	6	4	09	2	5	01	1	1	2	2	2					9	9	1							2	1
2014	53	M	6	4	09	1	5	02	1	1	2	2	1					9	9	1							9	1
2014	40	F	5	4	09	1	5	04	1	2	2	2	2					9	9	1							2	1
2014	20	M	6	4	09	2	1	10	1	2	2	2	2					1	9	1							2	1
2014	46	M	6	4	09	1	1	04	1	2	2	2	2					9	9	1							2	1
2014	62	M	6	4	09	1	1	09	1	1	2	2	2					1	2	1							2	1
2014	21	M	6	4	09	1	1	08	1	1	2	2	2					9	9	1							2	1
2014	25	M	6	4	09	2	4	10	1	2	2	2	2					9	9	1							2	1
2014	18	M	6	4	09	1	9	05	1	2	2	2	2					9	9	1							2	1
2014	10	F	6	4	09	2	1	09	1	2	2	2	2					9	9	1							2	1
2014	34	F	5	4	09	1	2	99	1	2	2	2	2					9	9	1							2	1
2014	37	M	6	4	09	2	1	05	1	1	2	2	2					9	9	1							9	1
2014	52	F	5	4	09	2	6	99	1	1	2	2	2					1	9	1							2	1
2014	19	F	5	4	09	2	3	04	1	2	2	2	1	2		1	2	9	9	1	5						2	1
2014	65	F	5	4	09	1	9	09	1	1	1	2	2					9	9	1							2	1
2014	46	M	6	4	09	1	2	04	1	1	2	2	2					9	9	1							2	1
2014	59	F	5	4	09	1	1	99	1	1	2	2	1					9	9	1							2	1
2014	69	F	6	5	09	2	4	02	1	2	2	2	2					1	4	1	2						1	1
2014	40	F	5	4	01	1	2	04	1	1	1	2	2	2		1	2	1	9	1							2	1
2014	47	M	6	4	02	1	9	06										9	9	1							1	1
2013	10	F	6	4	09	1	1	09	1	1	2	2	2					2	4	2							9	1
2014	47	F	5	4	09	1	1	99	1	2	2	2	2					9	9	1							2	1
2014	61	M	6	1		1	1	08	1	2	2	2	2					9	4								1	2
2014	44	M	6	4	02	2	2	09										2	4	1	4						1	1
2014	7	M	6	4	02	2	1	09	1	1	2	2	2					1	9	1							2	1
2014	2	M	6	4	10	1	1	09										9	9	1							2	1
2014	25	F	5	4	09	1	2	09	1	1	1	2	1					9	9	1							2	1
2014	10	M	6	4	09	1	2	99	1	1	2	2	2					1	9	1							2	1
2014	8	M	6	4	01	2	1	09	1	1	2	2	2					1	1	2	2						2	1
2014	67	F	6	4	00	2	2	05	1	1	2	2	2					9	9	1							1	1
2014	12	F	5	4	01	1	1	07	1	2	2	2	2					9	9	1							2	1
2014	25	M	6	4	03	1	3	08	1	1	2	2	2					9	1	1	5						1	1
2014	32	M	6	4	09	1	6	06										2	4	1							2	1
2014	2	M	6	4	10	1	4	99	1	1	1	2	2					1	9	1							2	1
2014	28	M	6	4	09	1	6	06	1	1	2	2	2					9	9	1							2	1
2014	30	M	6	4	06	2	2	05	1	1	2	2	2						1	2	2						1	1
2014	50	M	6	4	03	1	1	10	1	1	2	2	1					1	4	1							2
2014	16	F	5	4	09	1	2	09	1	1	2	2	2					9	9	1							2	1
2014	55	M	6	4	09	2	1	09	1	2	2	2	2					9	9	1							9	1
2014	30	F	5	4	04	1	1	02										1	1	1							2	1
2014	16	F	5	9	09	1	1	09	1	1	1	2	2					1	1	1							2	1
2014	41	M	6	4		2	2	09	1	1	2	2	2					2	9	1							1	1
2014	11	F	9	4		2	2	09	1	1	9	9	9					1	1	1							2	1
2014	16	F	5	4		2	2	09	1	1	9	9	9					1	1	1							2
2014	43	M	6	4	04	1	1	04	1	1	9	9	9					1	1	1							2
2014	5	F	6	4	10	2	1	05	1	1	9	9	9					1	1	1							2
2014	10	F	6	4	01	2	2	04	1	1	9	9	9					1	2	1							2	1
2014	51	F	5	4	02	2	4	10	1	1	9	9	9						2	1							2	1
2014	48	M	6	4	04	1	1	09	1	1	2	2	2					1	4	1							2	1
2014	26	F	5	4		2	3	08	1	1	2	2	2					1	1	1							2	1
2014	27	M	6	9	09	1	6	99	2	2	2	2	1					9	2	9							9	9
2014	25	M	6	4	02	1	5	99	2	2	2	2	1					1	4	1							2	1
2014	41	F	5	1	03	1	5	99	2	2	2	2	1					1	4	1							2	1
2014	48	M	6	4		2	2	05	1	1	2	2	2					1	1	1							1	1
2014	41	M	6	4		2	2	04	1	1	2	2	2					1	1	1							2	1
2014	38	M	6	4	09	1	6	99										9	4	1							2	1
2013	21	M	6	4		1	2	03	1	2	2	2	2					1	9	1							1	1
2013	65	M	6	4	05	1	2	09	1	2	2	2	2					9	4	2	5						1	1
2014	14	F	5	4		1	3	09	1	2	2	2	2						9	1							2	1
2014	69	M	6	4	09	1	2	08	1	1	2	2	2					9	1	2	2						1	1
2014	57	M	6	4	09	1	3	01	1	1	2	2	2					9	9	1							2	1
2014	23	M	6	4	09	2	6	08	2	1	2	2	2					9	9	1							2	1
2014	28	M	6	4	05	1	2	04	1	1	2	2	2					9	9	1							1	1
2013	70	M	6	4		1	1	03	1	1	2	2	2					1	2	1	3						1	1
2014	15	M	6	4	01	2	1	10	1	1	2	2	2					9	2	2							1	1
2014	20	F	5	4	02	1	3	09	1	1	2	2	9	1		2	2	9	9	2							1	2
2014	26	F	5	4		2	6	09	1	1	2	2	2					1	9	1	10							1
2014	51	M	6	4	09	2	2	09	1	2	2	2	2					9	9	1							2	1
2014	9	F	6	4	01	1	6	01	2	1	2	2	2					1	9	1							2	1
2014	6	M	6	4	10	1	2	01	1	2	2	2	2					1	4	1	1						2
2014	4	M	6	4	10	1	1	99	2	2	2	2	1					1	9	1							2	1
2014	29	F	5	4	01	1	3	99	2	2	2	2	1					1	9	1							2	1
2014	26	F	5	4	01	1	3	99	2	2	2	2	1					1	9	1							2	1
2014	1	F	6	4	10	1	3	99	2	2	2	2	1					1	9	1							2	1
2014	4	F	6	4	10	1	3	99	2	2	2	2	1					1	9	1							2	1
2014	4	F	6	4	10	1	3	99	2	2	2	2	1					1	9	1							2	1
2014	40	M	6	1	00	1	1	06	1	1	2	2	2					1	1	1							1	1
2014	5	F	6	4	10	2		04	1	2	2	2	2					9	9	1							2	1
2014	51	F	5	4	09	1	6	07	1	1	2	2	1	2		1	1	9	9	1							2	1
2014	26	M	6	4	09	1	3	07	1	2	2	2	2					1	9	1							2	1
2014	34	M	6	4	09	1	2	01	2	2	2	2	1					9	4	1							2	1
2014	58	M	6	4	02	2	2	09	1	2	2	2	2					9	9	2							1	1
2014	1	M	6	4	10	2	2	04	1	1	2	2	2					9	1	1							2	1
2014	18	F	5	4		2	1	05	2	1	2	2	2					1	9	1							2	1
2014	67	F	5	4	04	2	1	04	1	1	2	2	2					9	1	1							1	1
2014	1	M	6	2	10	1	1	09	1	1	2	2	2					9	1	1							1	1
2014	1	M	6	4	10	1	1	04	2	2	2	2	1					9	9	1							2	1
2014	39	F	5	5	00	2	5	04	1	1	2	2	2					9	9	1							1	1
2014	44	F	6	4	09	1	1	04	1	1	2	2	2					9	4	1							2	1
2014	69	F	6	5	00	1	2	08	1	2	2	2	2						2	1							1	1
2014	70	F	5	4	00	1	1	05	1	1	2	2	2					1	9	2	3						1	1
2014	13	F	5	5		2	9	09	1	2	2	2	2					9	9	1							2	1
2014	12	M	6	4	02	2	4	08	1	1	2	2	2	1		1	2	1	9	2	5						2	1
2014	33	F	5	5	01	1	2	04	1	1	2	2	2						9	1							1	1
2014	36	M	6	4	09	1	6	01	1	2	2	2	2					9	9	1							2	1
2014	42	M	6	5		2	2	09	1	1	2	2	2					9	9	1							2	1
2014	25	F	5	4	09	1	1	09	1	2	2	2	1					1	1	1	5						2	1
2014	14	M	6	4	04	1	6	09	1	2	2	2	2					9	4	1							2	1
2014	41	M	6	4	06	1	1	09	1	2	2	2	2					9	9	1							2	1
2014	44	M	6	4	01	2	2	08	1	1	2	2	2					1	9	1							1	1
2014	27	M	6	5	09	2	4	09	1	2	2	2	2					9	9	1							1	1
2014	35	M	6	4	02	1	2	08	1	2	2	2	2					9	9	1							2	1
2014	61	M	6	4	03	2	2	04	1	1	2	2	2					9	1	1							1	1
2014	53	F	5	5	02	1	6	09	1	1	2	2	2					2	9	1								1
2014	20	F	6	5	01	2	2	09	1	1	2	2	2					9	2	2							1	1
2014	55	M	6	5	01	2	1	05	1	2	1	2	2					1	1	1							1	1
2014	34	F	9	1	06	1	2	09	1	2	2	2	2	2		1	2	1	9	2	4						2	1
2014	45	M	6	4	02		2	09	1	1	2	2	2					1	1	1							2	1
2013	19	F	6	4	10	2	3	09	1	1	2	2	2					9	1	1							2	1
2014	16	M	6	4	09	1	4	07	1	2	2	2	2					9	9	1							2	1
2014	27	M	6	4	06	1	1	05	1	2	2	2	2					9	1	2								1
2014	43	M	6	4	09	2	3	04	1	1	2	2	2					9	9	1							2	1
2014	18	F	5	4	09	1	1	06	2	2	2	2	1					9	9	1							2	1
2014	17	M	6	4	09	1	1	09	1	2	2	2	1					9	9	1							2	1
2014	33	M	6	4	09	2	1	09										1	9	1							9	1
2014	2	M	6	5	10	2	2	07	1	1	9	9	1					1	9	1							2	1
2014	46	M	6	4	09	1	1	01										9	9	1							2	1
2014	38	M	6	4	09	1	5	04	1	1	2	2	2					1	9	1							2	1
2014	31	F	5	4	09	1	3	09	1	2	2	2	2					9	9	1							2	1
2014	30	M	6	4	09	1	3	04	1	2	2	2	2					9	9	1							2	1
2014	55	M	6	4	03	1	3	08	1	1	2	2	2					9	9	1	5						2	1
2014	67	M	6	4	01	1	3	04	1	1	2	2	2					9	2	1							2	1
2014	71	F	6	5	09	2	5	09	1	1	1	2	2	2		1	2	9	9	2							9	1
2014	1	M	6	5	10	2	1	04	1	1	2	2	2					1	9	1							2	1
2014	24	F	6	5	01	2	1	09	1	1	2	2	2					2	9	1							1	1
2014	21	F	5	5	01	2	1	02	1	2	2	2	2					2	9	1							2	1
