# Supplementary material
Source: publisher figshare collection journal article supplement (https://plos.figshare.com/articles/dataset/_/3932916)
Supplement: Supplementary file 1 [file 1 › S3 File.PDF]

## Written permission to publish under a CC BY license

I grant permission for use of Figure 2 contained in the manuscript entitled "Health System Performance, Indigenous status and antivenom Underdosage correlate with spider envenoming severity in the remote Brazilian Amazon" (PONE-D- 16-06026). I assure that this image was produced by me and understand that they will be published in the Plos One Journal under the Creative Commons Attribution License (CCAL) CC BY 4.0. I am also aware that this license allows unrestricted use and distribution, even commercially, by third parties.

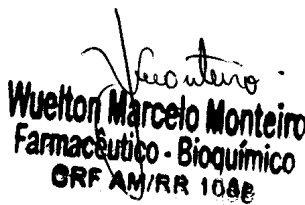

Wuelton Marcelo Monteiro  
Farmacêutico - Bioquímico  
ORF AM/RR 1088

---

Wuelton Marcelo Monteiro  
FMT-HVD/UEA
